# Supplementary material for: A novel broad spectrum venom metalloproteinase autoinhibitor in the rattlesnake Crotalus atrox evolved via a shift in paralog function
Source: PubMed Central journal article supplement (PMC9907073; doi:10.1073/pnas.2214880119), 2022-12-12
Supplement: pnas.2214880119.sapp.pdf [file pnas.2214880119.sapp.pdf]

## Supporting Information for

### **A novel broad spectrum venom metalloproteinase auto-inhibitor in the rattlesnake *Crotalus atrox* evolved via a shift in paralog function**

Fiona P. Ukken<sup>1</sup>, Noah L. Dowell<sup>1</sup>, Mamta Hajra<sup>1</sup>, and Sean B. Carroll<sup>1</sup>

Correspondence and request for materials should be addressed to Sean B. Carroll  
**Email:** [sbcarrol@umd.edu](mailto:sbcarrol@umd.edu).

#### **This PDF file includes:**

- Supporting text
- Figures S1 to S7
- Tables S1 to S4
- SI References

## Supplementary Methods

### Reference-guided assembly of the *fetua* genomic region

Pools of clones from a previously constructed whole genome BAC library (5 -7x coverage, average insert size of 80 - 150 kb) for *C. adamanteus* were PCR screened with *fetua-3* primers (Supplementary data 1B) to identify clones positive for the *fetua-3* genomic sequence (1). The University of Michigan DNA sequencing core prepared the Pacific Biosciences sequencing libraries using ten micrograms of BAC DNA according to the standard protocol with a size selection of large (> 10000 bp) DNA fragments. The sequencing library for each single BAC clone was sequenced in a single SMRT cell. The raw reads were assembled using the accuracy optimized HGAP2 (Hierarchical Genome Assembly Protocol) algorithm (2).

The *C. horridus* and *C. scutulatus* draft genome assemblies have been described previously (3). The *fetua-3* gene region was identified by LAST alignment of *C. atrox fetua* transcripts to *C. horridus* whole genome (4). Manual annotation of the *fetua* genes on the contig were combined with the crude gene coordinates from transcript alignments and with the inspection of hit coordinates for single exon BLASTs to produce refined gene models (5)

The *C. atrox fetua* gene complex was identified by alignment (bwa mem) of processed (adapter trimmed, overlap merged) whole genome shotgun sequencing reads (~60X genome coverage) to the *C. horridus fetua* genomic region (6). Aligned reads were filtered using quality score (samtools -q 20), concatenated (samtools cat), sorted (samtools sort) and used to call nucleotide variants (samtools mpileup -0u -f horridus\_fetA.fasta atrox\_aligned\_sort.bam | bcftools call -mv -Oz -o atrox\_fetA\_region\_) (7).

The variants were normalized (bcftools norm), filtered by removing adjacent variants within 5 basepairs of each other (bcftools filter —IndelGap 5) and indexed (bcftools index). The indexed variant file was then used to call a reference-based *C. atrox fetua* consensus genomic sequence (bcftools consensus) (8). Read coverage and gaps in coverage near the *fetua* gene loci was visualized using Gviz (9)

## **Purification of metalloproteinases from venom**

### *MDC-4 purification*

The purification of MDC4 from *C. atrox* venom followed the protocol of Williams et al. (10) with the following modifications, 400 mg of *C. atrox* venom was resuspended in 5 mL of 20 mM Tris-HCl buffer (pH 7.6), filtered through a 0.2 micron ( $\mu\text{m}$ ).

Durapore syringe filter and applied to a 5 mL HiTrap Q XL Sepharose anion exchange column. Column was washed with 20 mM Tris-HCl buffer (pH 7.6) until UV returned to baseline. Protein elution was performed at a rate of 5 ml/min using 20 mM Tris-HCl (pH 7.6), 1 M NaCl gradient (up to 60%) by an ÄKTA FPLC system (GE Healthcare, UK) over 120 ml as 2.5 ml fractions. The collected fractions were run on SDS-PAGE gels, analyzed by Coomassie staining and fractions with the protein of interest (strong band migrating at ~ 50 kDa) were pooled. The pooled fractions were concentrated using a 10,000 MWCO Amicon Ultra -15 centrifugal filter and applied to a size exclusion chromatography column (HiLoad 16/600 Superdex 75 pg). Protein elution was performed at a rate of 1 ml/min using 20 mM Tris-HCl (pH 7.6) with 1 ml fractions collected. The fractions were analyzed by SDS-PAGE and Coomassie staining and those containing strong band at ~50 kDa (MDC-4 and other expressed MDCs) were pooled and concentrated before a second run on the same size exclusion column. Fractions

containing the pure protein were pooled, concentrated, and stored as aliquots at  $-80^{\circ}\text{C}$  until further use (Fig S3 C). Protein estimation was performed using Quick Start Bradford 1x Dye Reagent (Bio-Rad) using bovine serum albumin (Thermo Scientific catalog # 23208,) as a standard.

#### *MAD-3 and MPO-1 purification*

*C. atrox* MAD-3 and MPO-1 were purified in a single protocol that used different buffer pH to separate MPO-1 (~24.7 kDa) from proteolytically processed MAD-3 (~19 kDa without disintegrin domain) (Fig S3 B). *C. atrox* venom (400 mg) was resuspended in 5 ml of 20 mM Bis-Tris buffer (pH 6.5), filtered through a 0.2  $\mu\text{m}$  Durapore syringe filter and loaded onto a 5 ml HiTrap SP Sepharose cation exchange column. Protein elution was performed at a rate of 5 ml/min using 20 mM Bis-Tris buffer (pH 6.5), 1 M NaCl gradient (up to 60%) by an ÄKTA purifier system (GE Healthcare, UK) over 120 mL as 2.5ml fractions. The collected fractions were run on SDS-PAGE gels, analyzed by Coomassie staining and fractions with the protein of interest were pooled. The flow-through fraction contained MAD-3 while MPO-1 was present in gradient elution fractions. The flow-through fraction was concentrated using 10,000 MWCO Amicon Ultra -15 centrifugal filter and dialyzed against 20 mM Tris-HCl (pH 7.6) while the MPO-1 containing fractions were dialyzed against 20 mM Piperazine (pH 5.18).

For MAD-3 purification the pooled, concentrated flow-through fractions were loaded onto a 5 ml HiTrap Q XL Sepharose anion exchange column and eluted over a salt gradient (up to 60%) as in MDC-4 purification. Fractions containing MAD-3 were pooled, concentrated in a 10,000 MWCO centrifugal filter and dialyzed against 20 mM

Tris-HCl (pH 7.6), 300 mM NaCl before loading on to two size exclusion chromatography columns connected in tandem (HiLoad 16/600 Superdex 75 pg). Elution was performed at 0.5 ml/min and collected as 2.5 ml fractions and those containing protein of interest was pooled and concentrated (Fig. S3C).

The MPO-1 containing fraction (in 20mM Piperazine (pH 5.1)) was concentrated and the sample (5 mL) was applied to a 5 mL HiTrap SP Sepharose cation exchange column equilibrated in the same buffer. The column was washed with 20mM Piperazine (pH 5.1) until no protein was detected by the UV detector and eluted by a linear concentration gradient (0 to 60%) of 20 mM Piperazine (pH 5.1), 1 M NaCl under a flow rate of 0.5 ml/min and temperature of 4 °C. The eluted MPO-1 fractions were dialyzed against 1X PBS concentrated to a 1 ml sample volume and loaded onto two HiLoad 16/600 Superdex 75 pg columns connected in tandem. Protein elution was performed at a rate of 1 ml/min using PBS (pH 7.2) and 2.5 ml fractions were collected. The fractions were analyzed by SDS-PAGE and Coomassie staining and those containing MPO-1 were pooled and concentrated (10,000 MWCO) and stored as aliquots at -80°C until further use. Protein estimation was performed using Quick Start Bradford 1x Dye Reagent (Bio-Rad) and bovine serum albumin (Thermo Scientific, catalog # 23208) as standards.

### **Mass Spectrometry**

#### *Enzymatic “In Gel” Digestion*

Coomassie R-250 stained gel pieces were de-stained (50 % methanol (MeOH), 50% water (H<sub>2</sub>O), 100 mM acetic acid (NH<sub>4</sub>HCO<sub>3</sub>)) completely, dehydrated (50% acetonitrile (ACN), 50% H<sub>2</sub>O, 25 mM NH<sub>4</sub>HCO<sub>3</sub>) for five minutes and then incubated for 30 seconds in 100%

ACN. Next, the samples were dried in a Speed-Vac for one minute, reduced in 25 mM DTT (Dithiotreitol in 25mM NH<sub>4</sub>HCO<sub>3</sub>) for 15 minutes at 56°C, alkylated with 55 mM CAA (Chloroacetamide in 25 mM NH<sub>4</sub>HCO<sub>3</sub>) in darkness at room temperature for 15 minutes, washed once in H<sub>2</sub>O, dehydrated (50% ACN, 50% H<sub>2</sub>O, 25 mM NH<sub>4</sub>HCO<sub>3</sub>) for two minutes in then incubated for 30 seconds in 100% ACN. The samples were dried again and rehydrated with 20 µl of trypsin solution with 0.01% ProteaseMAX™ surfactant (10 ng/µl *Trypsin* from Promega Corp. in 25 mM NH<sub>4</sub>HCO<sub>3</sub>, 0.01% w/v of ProteaseMAX™ from Promega Corp.), let stand for 2 minutes at room temperature then an additional 30 µl of overlay solution (25 mM NH<sub>4</sub>HCO<sub>3</sub>, 0.01% w/v of ProteaseMAX™) was added to keep gel pieces immersed throughout the digestion (three hours at 42°C). Peptides generated from digestion were transferred to a new tube and acidified with 2.5% TFA (trifluoroacetic Acid) to a 0.3% final concentration. Gel pieces were extracted further with 70 % ACN, 29.25% H<sub>2</sub>O, 0.75% TFA for ten minutes while vortexing and solutions combined and dried completely in a Speed-Vac (~15 minutes). Extracted peptides were solubilized in 30 µl of 0.05% TFA. Degraded ProteaseMAX™ was removed via centrifugation (max speed, ten minutes) and the peptides solid-phase extracted (*ZipTip*® C18 pipette tips from MilliporeSigma) according to the manufacturer's protocol. Peptides were eluted off the C18 SPE column with five microliters of 70% ACN, 30% H<sub>2</sub>O, 0.1%TFA, dried to completion, then resolubilized in 30 µl total volume with 0.1% formic acid, and two microliters was loaded on the instrument.

*NanoLC-MS/MS*

Peptides were analyzed by NanoLC-MS/MS using the Agilent 1100 nanoflow system (Agilent) connected to a hybrid linear ion trap-orbitrap mass spectrometer (LTQ-Orbitrap Elite™, Thermo Fisher Scientific) equipped with an EASY-Spray™ electrospray source (held at constant 35°C). Chromatography of peptides prior to mass spectral analysis was accomplished using capillary emitter column (PepMap® C18, 3µM, 100Å, 150x0.075mm, Thermo Fisher Scientific) onto which two microliters of extracted peptides was automatically loaded. NanoHPLC system delivered solvents A: 0.1% (v/v) formic acid, and B: 99.9% (v/v) acetonitrile, 0.1% (v/v) formic acid at 0.50 µl/min to load the peptides (over a 30 minute period) and 0.3 µl/min to elute peptides directly into the nano-electrospray with gradual gradient from 0% (v/v) B to 30% (v/v) B over 80 minutes and concluded with a five minute fast gradient from 30% (v/v) B to 50% (v/v) B at which time a four minute flash-out from 50-95% (v/v) B took place. Total run time of 150 minutes encompassed column conditioning at 95% B for one minute and equilibration at 100% A for 30 minutes. As peptides eluted from the HPLC-column/electrospray source survey MS scans were acquired in the Orbitrap with a resolution of 120,000 followed by CID-type MS/MS with 2.0 AMU isolation and 10 millisecond activation time with 35% normalized collision energy fragmentation of 30 most intense peptides detected in the MS1 scan from 350 to 1800 m/z; redundancy was limited by dynamic exclusion. Monoisotopic precursor selection and charge state screening were enabled and +1 and undefined charge states were rejected.

#### *Data analysis and cross-linking assignment*

Raw MS/MS data were converted to mgf file format using MSConvert (ProteoWizard: Open Source Software for Rapid Proteomics Tools Development) for downstream analysis. Resulting mgf files were used to search against user defined *C. atrox* venom proteome or liver proteome (translated transcriptome) amino acid sequence database with a list of common contaminants (172 total entries) using in-house *Mascot* search engine 2.7.0 (Matrix Science) with variable Methionine oxidation, Asparagine and Glutamine deamidation plus fixed cysteine Carbamidomethylation. Peptide mass tolerance was set at 10 ppm and fragment mass at 0.8 Da. Protein annotations, significance of identification, and spectral based quantification was done with help of Scaffold software (version 4.11.0, Proteome Software Inc., Portland, OR). Peptide identifications were accepted if they could be established at greater than 97.0% probability to achieve a False Discovery Rate (FDR) less than 1.0% by the Scaffold Local FDR algorithm. Protein identifications were accepted if they could be established at greater than 61.0% probability to achieve an FDR less than 1.0% and contained at least two identified peptides. Protein probabilities were assigned by the Protein Prophet algorithm (11). Proteins that contained similar peptides and could not be differentiated based on MS/MS analysis alone were grouped to satisfy the principles of parsimony. Proteins sharing significant peptide evidence were grouped into clusters.



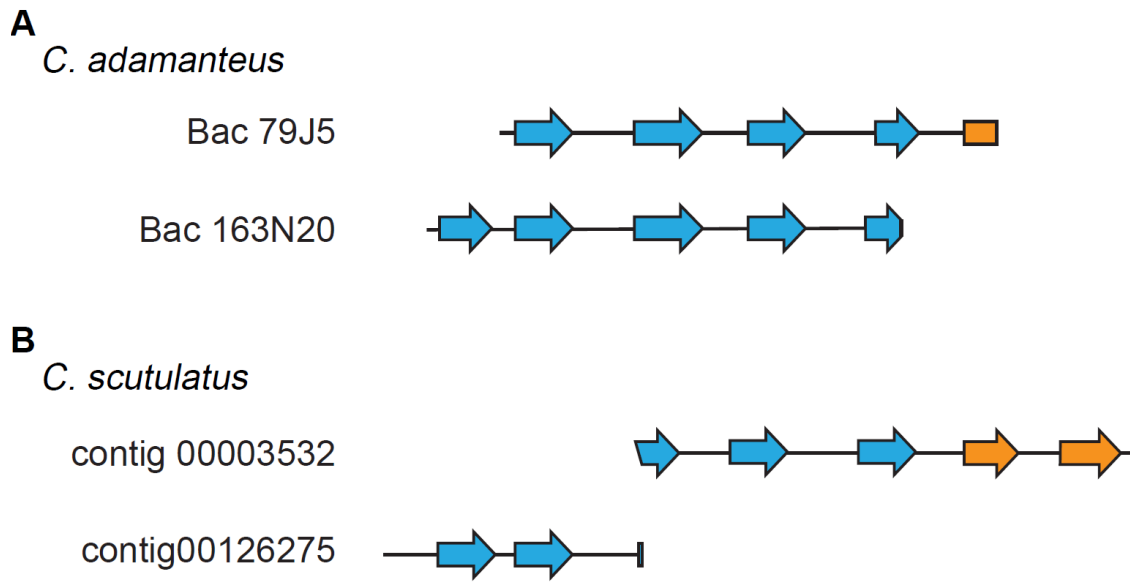

**Fig. S1.** Assembly of the fetua gene complex in *Crotalus* species. (A) Two overlapping BAC clones spanned the fetua locus in *C. adamanteus* to reveal five fetua genes (blue arrows). (B) The fetua locus in *C. scutulatus* was retrieved on two separate contigs from the *C. scutulatus* genome and shows at least five fetua genes and two fetub genes (orange arrows).

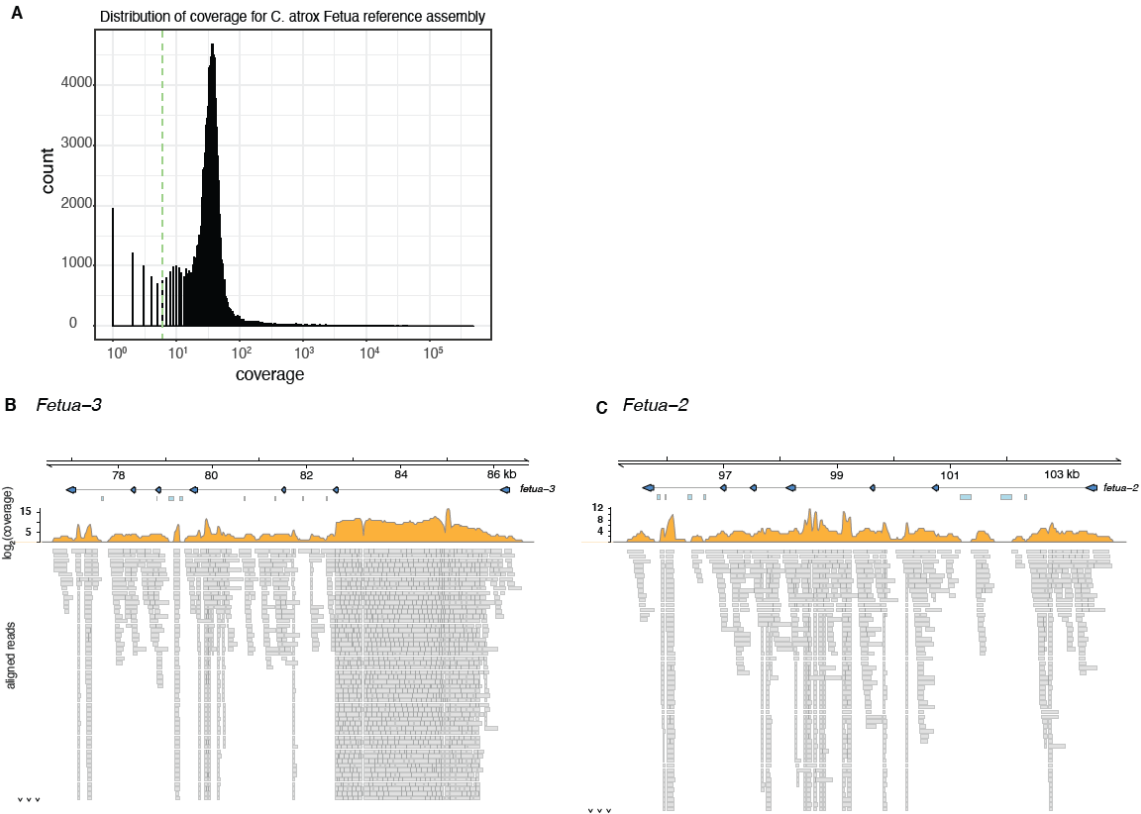

**Fig. S2.** Analysis of read coverage for reference guided assembly of *C. atrox Fetua* gene complex. (A) The distribution of coverage across the region. The mapped read coverage across the 220210 nucleotide (nt) region spans a wide range with a minimum of 0 (5046 nt) to a maximum of 485571 (mean = 11400, median = 46). The majority (54%) of nucleotides are covered by 10 to 100 reads but there are also regions with low or high coverage. The dashed green line shows the fifth percentile coverage level (6). (B-C) Log transformed read coverage (orange filled line plot) at the *fetua-3* (B) and *fetua-2* (C) loci with aligned reads shown as grey rectangles. Genes are shown as a grey line connecting exons (blue arrows) with masked zero coverage regions (light blue boxes) highlighted below the gene models.

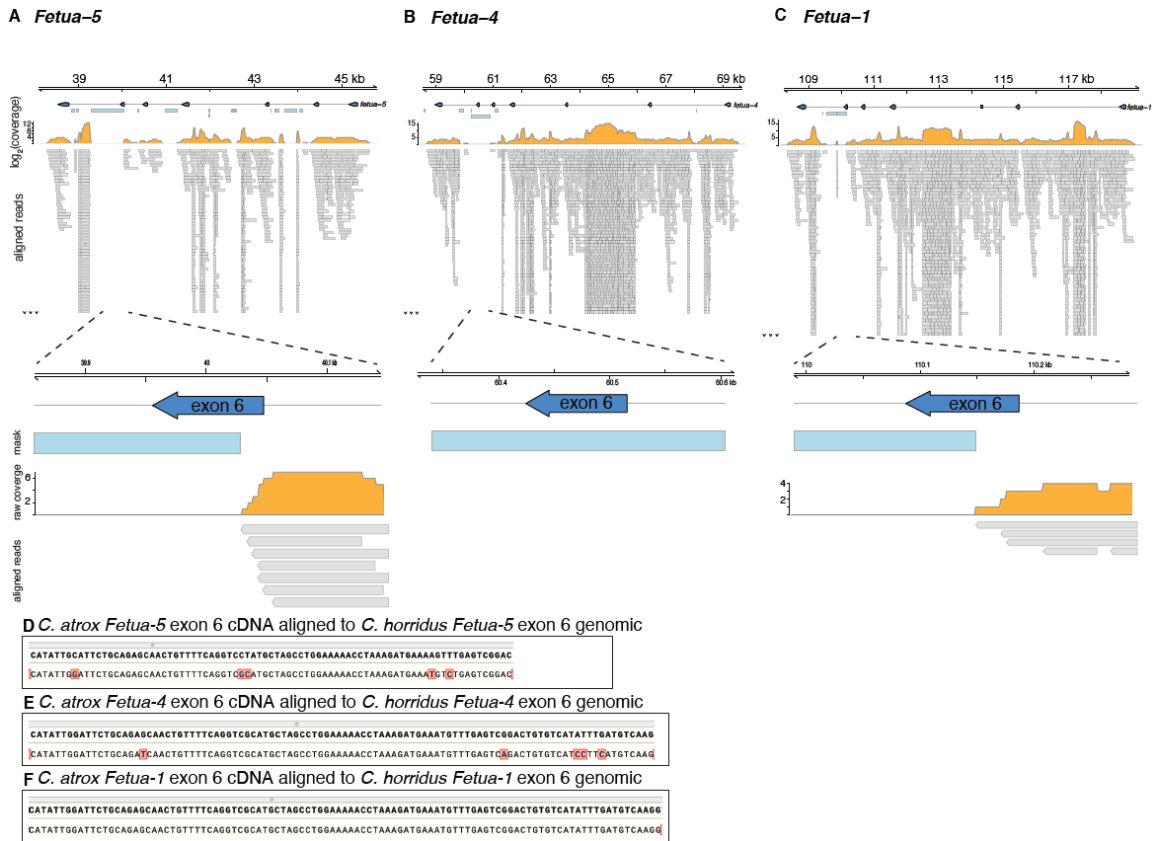

**Fig. S3.** (A - C) Log transformed read coverage (orange filled line plot) at the *fetua-5* (A), *fetua-4* (B) and *fetua-1* (C) genes with zoomed views (dashed line callouts) of exon 6 (blue arrow) and overlapping zero coverage masks (light blue rectangles). (D -F) Alignments of *C. atrox fetua-5* (D), *fetua-4* (E) and *fetua-1* (F) exon 6 cDNA sequences (bottom sequence with SNPs highlighted in pink boxes) to the corresponding *C. horridus* genomic sequence. The presence of these regions in the cDNA sequences supports the conclusion that exon 6 for these genes is present in the genome and their absence in our sequencing data is due to technical issues.

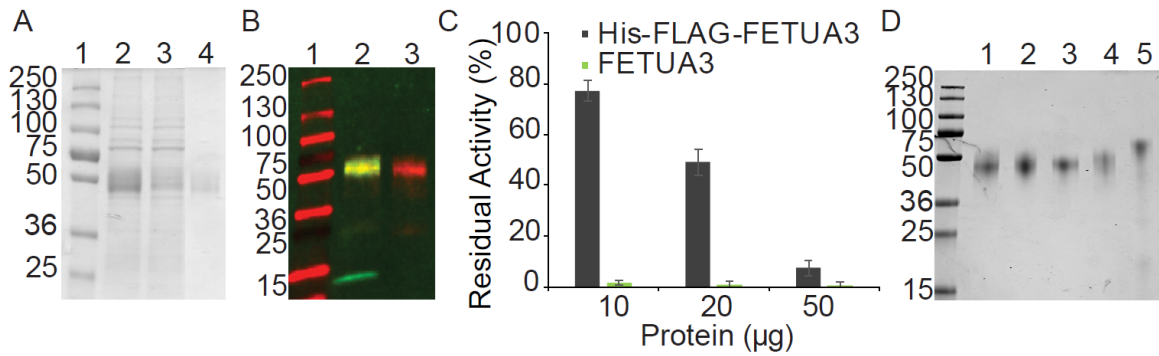

**Fig. S4.** Removal of the His-FLAG tag is necessary for optimal recombinant FETUA activity. (A) Coomassie stained SDS-PAGE of various fractions of recombinant *C. atrox* FETUA-3 purification. Lane 1 – protein standard, lane 2 – supernatant from recombinant FETUA-3 expressing cell line, lane 3 – flow-through from FLAG purification, lanes 4 – affinity purified His-FLAG-FETUA-3 protein. (B) Fluorescent Western blot of purified recombinant FETUA-3 blotted with anti-FLAG (green) and anti-FETUA-3 (red) antibodies. Lane 1 – protein standard, lane 2 – purified His-FLAG-FETUA-3 protein (yellow, detected by both antibodies), and lane 3 – enterokinase digested (untagged) FETUA-3 protein. (C) A comparison of the inhibitory activity of His-FLAG-FETUA-3 and FETUA-3 (tag removed) on *C. atrox* whole venom proteolytic activity on Azocoll substrate. (D) Coomassie stained SDS-PAGE of recombinant, tag-free *C. atrox* proteins, Lane 1 – FETUA-1, Lane 2 – FETUA-2, Lane 3 – FETUA-3, Lane 4 – FETUA-4, Lane 5 – FETUA-5.

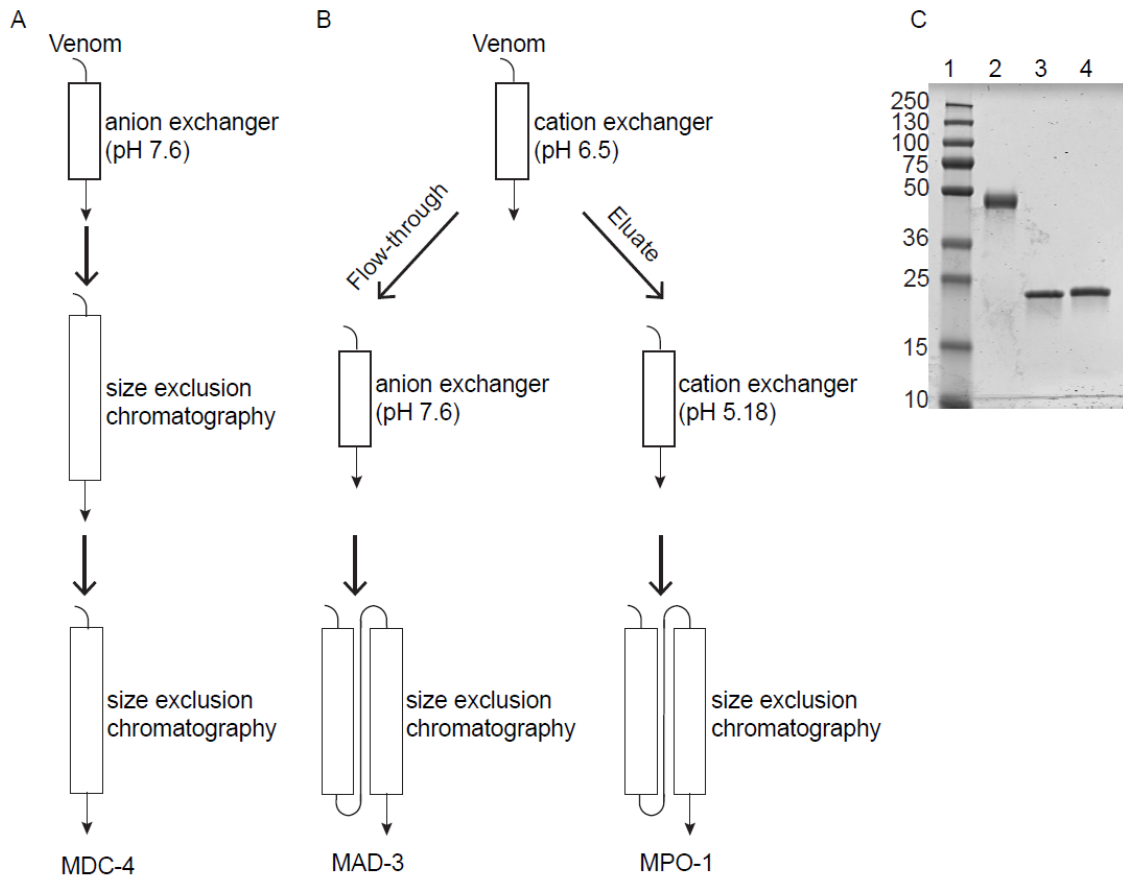

**Fig. S5.** Purification of SVMPs from *C. atrox* venom. (A) Schematic of MDC-4 purification from venom. (B) Schematic for purification of MAD-3 and MPO-1 from venom. (C) Purified SVMPs from venom analyzed by SDS-PAGE. Lane 1– Protein standard, lane 2 – MDC-4, lane 3 – MAD-3, lane 4 – MPO-1. See Supplementary Data 2 for Mass Spectrometry analyses of purified venom proteins.

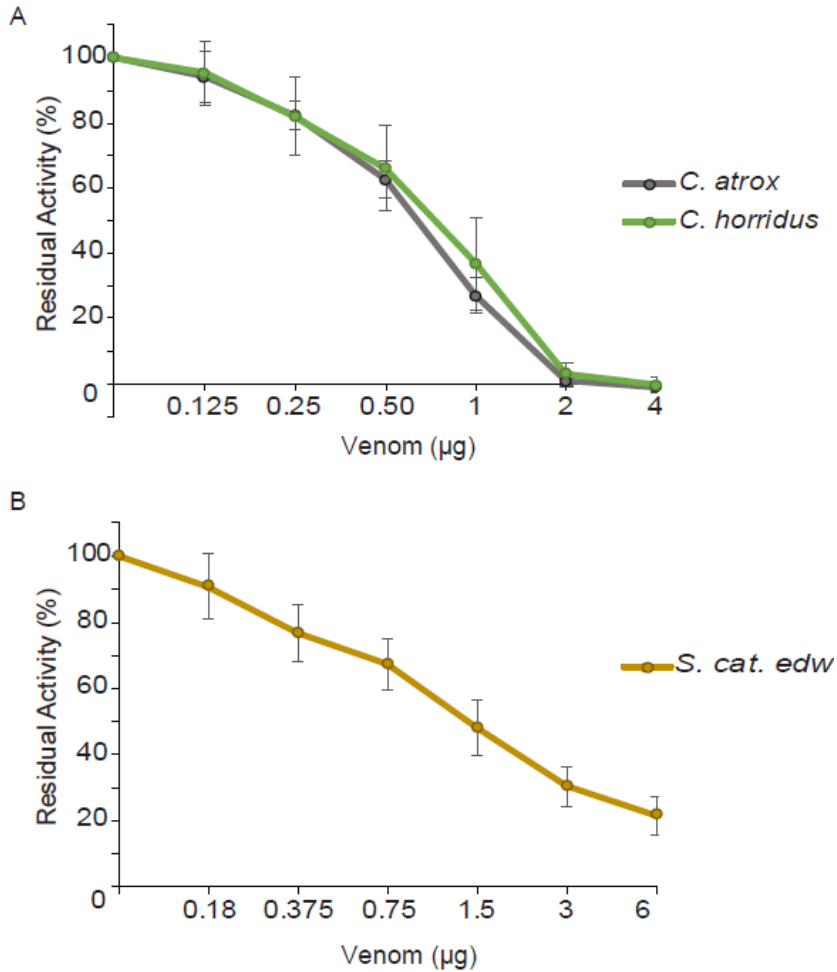

**Fig. S6.** *C. atrox* FETUA-3 shows cross-species inhibition of metalloproteinase activity. (A) Ten micrograms ( $\mu\text{g}$ ) of whole *C. atrox* venom and fifteen micrograms ( $\mu\text{g}$ ) of *C. horridus* venom were preincubated with FETUA-3 and was assayed for proteolysis of Azocoll substrate. (B) Twenty micrograms ( $\mu\text{g}$ ) of *Sistrurus catenatus edwardsii* venom was assayed metalloproteinase activity on Azocoll in the presence of FETUA-3. The activity of each of the venoms were normalized to the activity observed with two microgram of *C. atrox* MDC-4. Error bars indicate standard deviation.

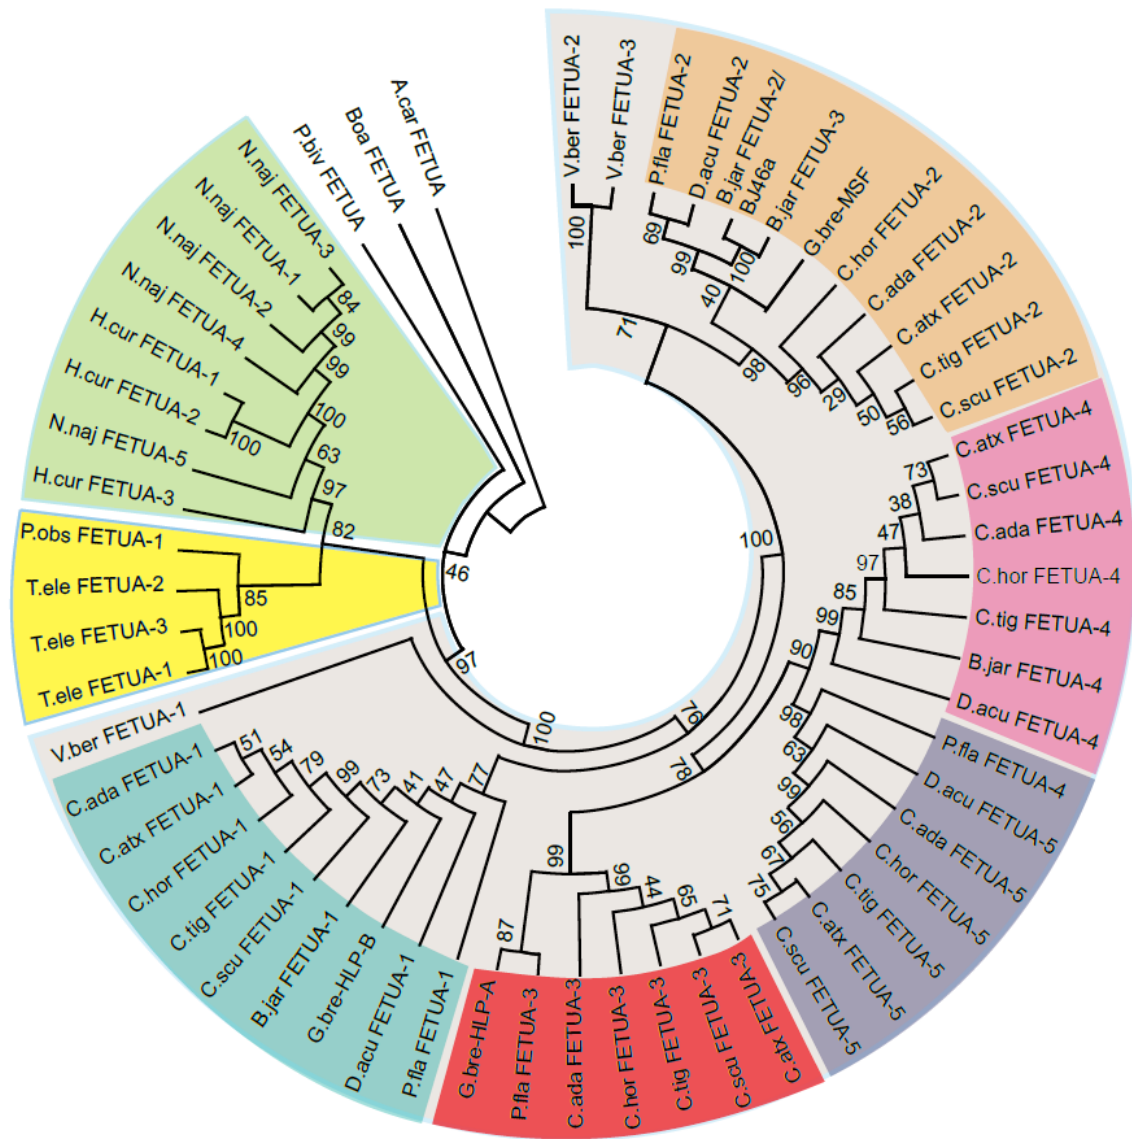

**Fig. S7.** *fetua-3* belongs to a different paralog group than other crocotalid SVMP inhibitors. A DNA phylogeny of full-length FETUA proteins was constructed using General Time Reversible (GTR) model. Taxa are color-coded: Colubrids – yellow; Elapids – green; and Viperids – grey. Paralog genes in viperid species are marked with similar colored arcs: FETUA-1 – teal; FETUA-2 – orange; FETUA-3 – red, FETUA-4 – pink; and FETUA-5 – purple. Numbers at the nodes indicate the bootstrap values of 1000 replicates

## Supplemental data

**S. Data. 1: (A)** List of primers used to recover cDNA clones from *C. atrox* liver mRNA (B) Primers used to screen BAC libraries for FETUA loci in *C. adamanteus* and *C. atrox*

### A. cDNA -PCRs

| Target   | 5' primer                   | 3'primer                  | Amplicon     |
|----------|-----------------------------|---------------------------|--------------|
| FETUA-5  | ATGAATTCCTGGTAGCTCTCGTG     | oligo-dT                  | full length  |
| FETUA-3  | ATGAATTCCTGGTAGCTCTCGTG     | oligo-dT                  | full length  |
| FETUA-1  | ATGAATTCCTGGTAGCTCTCGTG     | oligo-dT                  | full length  |
| FETUA-4a | GAGTCTTCCTTCTTTCCAAGTAGTG   | TAAAATACCGTCGTAAACCTCTCCG | TSS - 227bp  |
| FETUA-4a | CCGGAGAGGTTTACGACGGT        | TCTCAATGCTCTCTAGTATGGCTGG | 202bp- 3'UTR |
| FETUA-2a | GAGTCTTCCTTCTTTCCAAGTAGTG   | TTTAAGGTAGACTGCCACCAAATC  | TSS-160bp    |
| FETUA-2a | TCTCAAGTGAGGGGGGATTTAGAATGT | oligo-dT                  | 60bp-stop    |

### B . BAC Library screen

| Target       | 5' primer                    | 3'primer                   | Amplicon |
|--------------|------------------------------|----------------------------|----------|
| FETUA Ex 5-7 | GTTTGCTATTGTGGAGGTTAACTGCACT | CACCACACATTCATCAGTACTGTTGC | ~2Kb     |



**S. Data. 2:** Identification of the purified SVMP proteins from *C. atrox* venom via Mass Spectrometry by LC-MS/MS. Purified fraction (A) MDC-4, (B) MAD-3a/b, and (C) MPO-1( higher ~20kDa and lower ~13kDa bands). The highest number of peptides within each sample is highlighted in grey.

(A) MDC-4

| Proteins                           | Exclusive Spectrum Count | Total Spectral Count | Total Unique Peptide Count |
|------------------------------------|--------------------------|----------------------|----------------------------|
| atx_mdc-4                          | 1844                     | 1995                 | 49                         |
| atx_mdc-5a                         | 3                        | 55                   | 9                          |
| atx_mdc-5b                         | 4                        | 56                   | 11                         |
| atx_mdc-2                          | 1                        | 46                   | 4                          |
| atx_mad-3a                         | 3                        | 11                   | 9                          |
| atx_mad-3b                         | 1                        | 8                    | 7                          |
| atx_mdc-8a                         | 4                        | 5                    | 3                          |
| atx_mdc-8c                         | 5                        | 6                    | 3                          |
| atx_mad-2b                         | 1                        | 4                    | 4                          |
| atx_mpo-1                          | 0                        | 2                    | 2                          |
| atx_mdc-3b                         | 1                        | 4                    | 4                          |
| atx_mdc-3a                         | 1                        | 4                    | 4                          |
| atx_gA1                            | 15                       | 15                   | 6                          |
| atx_mdc-6a                         | 4                        | 13                   | 8                          |
| OXLA_CROAT_Laao                    | 14                       | 14                   | 10                         |
| VSP1_CROAT_svsp_catroxase-I        | 16                       | 16                   | 7                          |
| atx_mdc-6d                         | 9                        | 10                   | 6                          |
| atx_mad-5b                         | 6                        | 8                    | 6                          |
| VSPA1_CROAT_Alpha-fibrinogenase-A1 | 9                        | 9                    | 1                          |
| VSP2_CROAT_svsp_catroxase-2        | 7                        | 7                    | 6                          |
| VSPC1_CROAT_svsp_catroxbin-1       | 2                        | 2                    | 1                          |
| TXVE_CROAT_sVEGF_Cratrin           | 1                        | 1                    | 1                          |
| atx_mdc-6e                         | 1                        | 1                    | 1                          |

(B) MAD-3

| Protein    | Exclusive Spectrum Count | Total Spectral Count | Total Unique Peptide Count |
|------------|--------------------------|----------------------|----------------------------|
| atx_mpo-1  | 26                       | 29                   | 13                         |
| atx_mad-3a | 66                       | 248                  | 11                         |
| atx_mad-3b | 48                       | 230                  | 12                         |
| atx_mad-6  | 12                       | 12                   | 2                          |

(C) MPO-1

| Protein    | Exclusive Spectrum Count | Total Spectral Count | Total Unique Peptide Count |
|------------|--------------------------|----------------------|----------------------------|
| atx_mpo-1  | 501                      | 613                  | 25                         |
| atx_mad-5a | 1                        | 1                    | 1                          |

**S. Data. 3(A):** Assignment of the FETUA-3 Affinity purified total eluate fractions of *C. atrox* Venom to SVMP genes via Mass Spectrometry by LC-MS/MS

| Protein name | Protein identification probability | Peptide sequence                | Number of Spectra |
|--------------|------------------------------------|---------------------------------|-------------------|
| atx_mad-1b   | 97.90%                             | VTTGSQCAEGLCCDQCK               | 1                 |
| atx_mad-3a   | 100.00%                            | RHDNAQLLTSIDFDGPTIGLAYIGSICDPK  | 3                 |
|              | 100.00%                            | RHDNAQLLTSIDFDGPTIGLAYIGSICDPKR | 1                 |
|              | 100.00%                            | RSTGVVQDHSEINLR                 | 19                |
|              | 100.00%                            | STGVVQDHSEINLR                  | 15                |
|              | 100.00%                            | YFSDCSYIQCWNFIMNQKQCILK         | 6                 |
|              | 100.00%                            | YVELFIVVDHGMFTK                 | 25                |
| atx_mad-3b   | 100.00%                            | DGICDPKR                        | 7                 |
|              | 100.00%                            | ISHDNAQLLTSTDFNR                | 6                 |
|              | 100.00%                            | QAIGLAYR                        | 3                 |
|              | 100.00%                            | QAIGLAYRDGICDPK                 | 1                 |
|              | 100.00%                            | RSTGVVQDHSK                     | 2                 |
|              | 100.00%                            | STGVVQDHSK                      | 6                 |
|              | 100.00%                            | VSMVDRNDDTCTGQSADCPR            | 2                 |
|              | 100.00%                            | YFSDCSYIQCWDFIMNQNPQCILK        | 15                |
|              | 100.00%                            | YVELFIVVDHGMYSK                 | 43                |
|              | atx_mad-4a                         | 100.00%                         | AWVVEIFNTINEIFQR  |
| 100.00%      |                                    | SHDNAQLLTSIDLGDGPTIGLAYIGGICDPK | 3                 |
| atx_mad-4b   | 100.00%                            | AWVVEIVNTINEIFQR                | 2                 |

|            |         |                                                         |    |
|------------|---------|---------------------------------------------------------|----|
|            | 100.00% | IIVQSSADITLDFGTWR                                       | 4  |
|            | 100.00% | NLCCDAATCK                                              | 1  |
|            | 100.00% | SHDNAQLLTSINFDGQTIGWAYIGGICDSK                          | 35 |
|            | 100.00% | SHDNAQLLTSINFDGQTIGWAYIGGICDSKR                         | 17 |
|            | 100.00% | STGVVQDFSPINFLVAITMAHEMGHNLGMTHDENYCSCGGFACIMSPVISPQPSK | 0  |
| atx_mad-5a | 100.00% | AYTGSMCDPR                                              | 4  |
|            | 100.00% | AYTGSMCDPRK                                             | 1  |
|            | 100.00% | ISHDNAQLLTAINFQENIIGR                                   | 21 |
|            | 100.00% | ISHDNAQLLTAINFQENIIGRAYTGSMCDPR                         | 1  |
|            | 100.00% | IWVHEIVNTINVFYR                                         | 6  |
|            | 100.00% | YIELVIVADHR                                             | 29 |
|            | 100.00% | YNSNLNTIR                                               | 9  |
|            | 100.00% | YNSNLNTIRIWWHEIVNTINVFYR                                | 1  |
| atx_mdc-2  | 100.00% | AAKDECDMADVCTGR                                         | 1  |
|            | 100.00% | ACSNQQCVDVTPY                                           | 2  |
|            | 100.00% | CPIMADQCIALFGPGATVSQDACFQFNR                            | 4  |
|            | 100.00% | DECDMADVCTGR                                            | 2  |
|            | 100.00% | DHREFLIK                                                | 1  |
|            | 100.00% | DTCTCGTRPCVMAGALSCEASFLFSDCSQK                          | 1  |
|            | 100.00% | EGNHYGYCR                                               | 1  |
|            | 100.00% | IACEPQDVK                                               | 1  |
|            | 100.00% | LRQGAQCAEGLCCDQCR                                       | 1  |
|            | 100.00% | MYDIVNVITPIYHR                                          | 1  |

|            |         |                                           |     |
|------------|---------|-------------------------------------------|-----|
|            | 100.00% | NMPQCILK                                  | 1   |
|            | 100.00% | NNNGYCYNGK                                | 2   |
|            | 100.00% | NPCNIYYSPNDEDK                            | 1   |
|            | 100.00% | QGAQCAEGLCCDQCR                           | 2   |
|            | 100.00% | SHDNAQLLTGINFNGPTAGLGYLGGICNTMYSAGIVQDHSK | 5   |
|            | 100.00% | TCRDPCCDATTCK                             | 2   |
|            | 100.00% | TDVVSPAFCGNYFVEVGEECDGSPR                 | 1   |
| atx_mdc-3a | 99.20%  | LHSWVECESGECCDQCR                         | 1   |
| atx_mdc-4  | 100.00% | AMVTKNNGDLDK                              | 2   |
|            | 100.00% | ASMSECDPAEHCTGQSSECPADVFK                 | 35  |
|            | 100.00% | DNSPGQNNPCK                               | 45  |
|            | 100.00% | ENGNKIPCAPEDVK                            | 14  |
|            | 100.00% | FVELFLVVDK                                | 35  |
|            | 100.00% | GNYYGYCR                                  | 10  |
|            | 100.00% | GNYYGYCRK                                 | 12  |
|            | 100.00% | HDNAQLLTAIDLDR                            | 55  |
|            | 100.00% | HDNAQLLTAIDLDRVIGLAYVGSMPK                | 11  |
|            | 100.00% | HDNAQLLTAIDLDRVIGLAYVGSMPKR               | 0   |
|            | 100.00% | ITVKPEAGYTLNAFGWR                         | 101 |
|            | 100.00% | ITVKPEAGYTLNAFGWRK                        | 21  |
|            | 100.00% | ITVKPEAGYTLNAFGWRKTDLLTR                  | 1   |
|            | 100.00% | KENGNKIPCAPEDVK                           | 4   |
|            | 100.00% | KHDNAQLLTAIDLDR                           | 75  |

|            |         |                                                  |     |
|------------|---------|--------------------------------------------------|-----|
|            | 100.00% | KHDNAQLLTAIDLDRVIGLAYVGSMCHPK                    | 8   |
|            | 100.00% | KKHDNAQLLTAIDLDR                                 | 3   |
|            | 100.00% | KTDLLTRK                                         | 5   |
|            | 100.00% | LYCKDNSPGQNNPCK                                  | 1   |
|            | 100.00% | MFYSNEDEHK                                       | 50  |
|            | 100.00% | MYEIVNTVNEIYR                                    | 124 |
|            | 100.00% | MYEIVNTVNEIYRYMYIHVALVGLIWSNEDK                  | 6   |
|            | 100.00% | MYEIVNTVNEIYRYMYIHVALVGLIWSNEDKITVKPEAGYTLNAFGWR | 1   |
|            | 100.00% | NGQPCLDNYGYCYNGNCPIMYHQCYDLFGADVYEAEDSCFER       | 136 |
|            | 100.00% | NQKGNYYGYCR                                      | 1   |
|            | 100.00% | TRMYEIVNTVNEIYR                                  | 3   |
|            | 100.00% | TRMYEIVNTVNEIYRYMYIHVALVGLIWSNEDK                | 1   |
|            | 100.00% | VCSNGHCVDVATAY                                   | 32  |
|            | 100.00% | VIGLAYVGSMCHPK                                   | 91  |
|            | 100.00% | VIGLAYVGSMCHPKR                                  | 1   |
|            | 100.00% | YMYIHVALVGLIWSNEDK                               | 102 |
|            | 100.00% | YMYIHVALVGLIWSNEDKITVKPEAGYTLNAFGWR              | 4   |
|            | 100.00% | YNPFRFVELFLVVDKAMVTK                             | 1   |
| atx_mdc-5a | 100.00% | AFDSNEDDHK                                       | 1   |
|            | 100.00% | AHVASMCEPK                                       | 1   |
|            | 100.00% | GDDDGYCR                                         | 4   |
|            | 100.00% | GDDDGYCRK                                        | 2   |
|            | 100.00% | HDNAQLLTAIDFSGSTIGK                              | 1   |

|            |         |                           |    |
|------------|---------|---------------------------|----|
|            | 100.00% | RSECDIAESCTGQSDDCPTDDFHR  | 3  |
|            | 100.00% | SECDIAESCTGQSDDCPTDDFHR   | 1  |
|            | 100.00% | VCSNGHCVDVASAY            | 4  |
| atx_mdc-5b | 100.00% | AYIASMCDPK                | 5  |
|            | 100.00% | FCTNGHCVDVATAY            | 2  |
|            | 100.00% | GDDYGYCRK                 | 1  |
|            | 100.00% | LYCNDNSPGQNNPCK           | 1  |
|            | 100.00% | RSECDIAESCTGQSADCPMDDFHK  | 2  |
| atx_mdc-6a | 100.00% | LFCNVNDFLCR               | 7  |
|            | 100.00% | NRQCVDTVTTAYK             | 1  |
|            | 100.00% | QCVDVTTAYK                | 1  |
|            | 100.00% | RYVELVIVADHR              | 12 |
|            | 100.00% | YVELVIVADHR               | 1  |
| atx_mdc-6b | 100.00% | EQPSYEFSDCSQNQYLR         | 1  |
|            | 100.00% | YSADPDYGMVNHGTK           | 1  |
| atx_mdc-6c | 100.00% | LFCEVNNFPCR               | 1  |
| atx_mdc-6d | 100.00% | ENGVNIPCSYEDVK            | 2  |
|            | 100.00% | FALVGLEIWSNGDK            | 1  |
|            | 100.00% | ITVQSSAYNTLDSFEEWRETDLLTR | 2  |
|            | 100.00% | LFCEFNNFPCQYK             | 2  |
|            | 100.00% | RHDNAQLLTAIDFDGR          | 2  |
|            | 100.00% | SECDIAESCTGQSADCPTDDFHR   | 3  |
|            | 100.00% | TLGLASVSSMCNQK            | 1  |

|            |                       |                                                   |    |
|------------|-----------------------|---------------------------------------------------|----|
|            | 100.00%               | YSELDYGMVDHGTK                                    | 2  |
| atx_mdc-6e | 99.90%                | DDCDMAESCTGR                                      | 1  |
| atx_mdc-7  | 100.00%               | DDCDMADLCTGQSAECPTDR                              | 4  |
|            | 100.00%               | DEDIGMVLPGTK                                      | 2  |
|            | 100.00%               | GSSYGYCR                                          | 1  |
|            | 100.00%               | GSSYGYCRK                                         | 1  |
|            | 100.00%               | GSVGVIQEHSTINLLMAVTMAHEMGHNLGMDHDIK               | 2  |
|            | 100.00%               | IPCPPQDVK                                         | 1  |
|            | 100.00%               | IYEIVNTMNEIYIPLNIHVALVR                           | 10 |
|            | 100.00%               | KYVEFVVLDHGMYTK                                   | 4  |
|            | 100.00%               | LFCFPNKPGEK                                       | 2  |
|            | 100.00%               | LTPGSQCADGVCCDQCR                                 | 4  |
|            | 100.00%               | NGHPCLNNK                                         | 9  |
|            | 100.00%               | NQCISFFGPSATVAK                                   | 3  |
|            | 100.00%               | NVCNVIYMSR                                        | 3  |
|            | 100.00%               | NVCNVIYMSRDEDIGMVLPGTK                            | 5  |
|            | 100.00%               | RPQCILNEPLR                                       | 2  |
|            | 100.00%               | RPQCILNEPLRTDIVSPPVCGNELLEVGEEDCGSPGNCQNPCCNATTCK | 2  |
|            | 100.00%               | SHDNAQLLTTIDFDGDTVGLAYVR                          | 8  |
| 100.00%    | VCNSNGQCVDVNR         | 10                                                |    |
| 100.00%    | VCNSNGQCVDVNRAY       | 2                                                 |    |
| 100.00%    | YCTCGAPSCIMADTLSHQPSK | 3                                                 |    |
| 100.00%    | YVEFVVLDHGMYTK        | 7                                                 |    |



|            |         |                                   |    |
|------------|---------|-----------------------------------|----|
| atx_mdc-8b | 100.00% | SECDIAESCTGR                      | 1  |
| atx_mdc-8c | 100.00% | CPTLDHQCISFFGSNAAVAPDVCFDFNLK     | 1  |
|            | 100.00% | FSDCSRDEHWR                       | 2  |
|            | 100.00% | GEGNFYCR                          | 1  |
|            | 100.00% | HDNAQLLTAIDL DGPTIGLAR            | 1  |
|            | 100.00% | IFPCAPQDK                         | 1  |
|            | 100.00% | IFPCAPQDKK                        | 2  |
|            | 100.00% | LFCVLGPTGNTISCQSTSSQSDLDIGMVDLGTK | 3  |
|            | 100.00% | LRPGTQCEDGECCEQCQFR               | 1  |
|            | 100.00% | NGQPCLNNGYCYNGK                   | 8  |
|            | 100.00% | RHDNAQLLTAIDL DGPTIGLAR           | 1  |
|            | 100.00% | RHDNAQLLTAIDL DGPTIGLARV GSMCDPK  | 0  |
|            | 100.00% | RSTGIVQDHSK                       | 1  |
|            | 100.00% | SECDIAESCTGQSADCPTDNFQR           | 3  |
|            | 100.00% | STGIVQDHSK                        | 4  |
| atx_mpf-1a | 100.00% | LIFELGYR                          | 1  |
|            | 100.00% | LKPGTQCEDGVCCDR                   | 1  |
| atx_mpo-1  | 100.00% | AYTSSMCNPR                        | 29 |
|            | 100.00% | DHSPINLLVGVTMAHELGHNLGMNHDGDK     | 51 |
|            | 100.00% | GASLCIMRPGLTPGR                   | 50 |
|            | 100.00% | ITTNPSVEDHCYYR                    | 2  |
|            | 100.00% | KRVHELVENTINGFYR                  | 3  |
|            | 100.00% | KSHDHAQLLTAINFEGK                 | 2  |

|         |                                      |     |
|---------|--------------------------------------|-----|
| 100.00% | NTLNSFGGEWR                          | 27  |
| 100.00% | NTLNSFGEWREADLLR                     | 2   |
| 100.00% | RVHELVENTINGFYR                      | 17  |
| 100.00% | SHDHAQLLTAINFEGK                     | 112 |
| 100.00% | SHDHAQLLTAINFEGKIIGR                 | 1   |
| 100.00% | SHDHAQLLTAINFEGKIIGRAYTSSMCNPR       | 3   |
| 100.00% | SLNIDVSLTDLEIWSQQDFITVQSSAK          | 50  |
| 100.00% | SVGIVKDHSPINLLVGVMTMAHELGHNLGMNHDGDK | 0   |
| 100.00% | VFMKYNSDLNIIR                        | 1   |
| 100.00% | VHELVENTINGFYR                       | 45  |
| 100.00% | YIELVVVADHRVFMK                      | 3   |
| 100.00% | YNSDLNIIR                            | 20  |
| 100.00% | YNSDLNIIRK                           | 10  |

**S. Data. 3(B):** Assignment of the FETUA-3 Affinity purified fraction (gel excised, upper band) of *C. atrox* Venom to SVMP genes via Mass Spectrometry by LC-MS/MS

| Protein name | Protein identification probability | SL # | Peptide sequence | Number of Spectra |
|--------------|------------------------------------|------|------------------|-------------------|
| atx_mad-3b   | 98%                                |      | QAIGLAYR         | 1                 |
| atx_mad-5a   | 99%                                |      | YNSNLNTIR        | 1                 |
| atx_mdc-2    | 99%                                |      | EGNHYGYCR        | 1                 |
| atx_mdc-3a   | 98%                                |      | VTLDSFGNWR       | 1                 |
| atx_mdc-4    | 100%                               |      | AMVTKNNGDLDK     | 3                 |

|      |                                            |    |
|------|--------------------------------------------|----|
| 100% | AMVTKNNGDLKIK                              | 2  |
| 100% | ASMSECDPAEHCTGQSSECPADVFK                  | 11 |
| 100% | CADGKVCNNGHCVDVATAY                        | 4  |
| 100% | DNSPGQNNPCK                                | 38 |
| 100% | DNSPGQNNPCKMFYSNEDEHK                      | 1  |
| 100% | ENGNKIPCAPEDVK                             | 7  |
| 100% | ENGNKIPCAPEDVKCGR                          | 3  |
| 100% | FSKSGTECR                                  | 3  |
| 100% | FVELFLVVDK                                 | 2  |
| 100% | FVELFLVVDKAMVTK                            | 1  |
| 100% | GNYYGYCR                                   | 23 |
| 100% | GNYYGYCRK                                  | 4  |
| 100% | HDNAQLLTAIDLDR                             | 8  |
| 100% | HDNAQLLTAIDLDRVIGLAYVGSMPK                 | 6  |
| 100% | HDNAQLLTAIDLDRVIGLAYVGSMPKR                | 0  |
| 100% | ITVKPEAGYTLNAGFEWR                         | 9  |
| 100% | ITVKPEAGYTLNAGFEWRK                        | 3  |
| 100% | KENGNKIPCAPEDVK                            | 21 |
| 100% | KHDNAQLLTAIDLDR                            | 14 |
| 100% | KHDNAQLLTAIDLDRVIGLAYVGSMPK                | 2  |
| 100% | KKHDNAQLLTAIDLDR                           | 35 |
| 100% | KTDLLTRK                                   | 2  |
| 100% | LKSGSQCGHGDCCEQCKFSK                       | 1  |
| 100% | LYCKDNSPGQNNPCK                            | 14 |
| 100% | MFYSNEDEHK                                 | 9  |
| 100% | MFYSNEDEHKGMVLPGTK                         | 15 |
| 100% | MYEIVNTVNEIYR                              | 31 |
| 100% | NGQPCLDNYGYCYNGNCPIMYHQCYDLFGADVYEAEDSCFER | 2  |

|            |      |  |                                 |    |
|------------|------|--|---------------------------------|----|
|            | 100% |  | NQKGNYYGYCR                     | 8  |
|            | 100% |  | SGSQCGHGDCCEQCKFSK              | 2  |
|            | 100% |  | SGSQCGHGDCCEQCKFSKSGTECR        | 1  |
|            | 100% |  | SGTECRASMSECDPAEHCTGQSSECPADVFK | 0  |
|            | 100% |  | TRMYEIVNTVNEIYR                 | 4  |
|            | 100% |  | VCSNGHCVDVATAY                  | 7  |
|            | 100% |  | VIGLAYVGSMCHPK                  | 13 |
|            | 100% |  | VIGLAYVGSMCHPKR                 | 2  |
|            | 100% |  | YMYIHVALVGLEIWSNEDK             | 3  |
| atx_mdc-5a | 100% |  | NQKGDDDGYCR                     | 2  |
|            | 100% |  | NQKGDDDGYCRK                    | 1  |
|            | 100% |  | RSECDAESCTGQSDDCPTDDFHR         | 2  |
|            | 100% |  | SECDAESCTGQSDDCPTDDFHR          | 1  |
|            | 100% |  | VCSNGHCVDVASAY                  | 1  |
| atx_mdc-5b | 100% |  | FCTNGHCVDVATAY                  | 1  |
| atx_mdc-6a | 100% |  | LFCNVNDFLCR                     | 1  |
|            | 100% |  | QCVDVTTAYK                      | 1  |
| atx_mdc-6d | 100% |  | ENGVNIPCSYEDVK                  | 1  |
|            | 100% |  | KRHDNAQLLTAIDFDGR               | 1  |
|            | 100% |  | SECDAESCTGQSADCPTDDFHR          | 1  |
|            | 100% |  | TLGLASVSSMCNQK                  | 1  |
|            | 100% |  | YSELDYGMVDHGK                   | 1  |
| atx_mdc-7  | 100% |  | GKVCNSNGQCVDVNR                 | 1  |
|            | 100% |  | LFCFPNKPGEK                     | 1  |
|            | 100% |  | LTPGSQCADGVCCDQCR               | 1  |
|            | 100% |  | NQCISFFGPSATVAK                 | 1  |
|            | 100% |  | RPQCILNEPLR                     | 1  |
|            | 100% |  | VCNSNGQCVDVNR                   | 1  |

|            |      |  |                            |   |
|------------|------|--|----------------------------|---|
|            | 100% |  | YKDDLDKIK                  | 1 |
| atx_mdc-8c | 100% |  | IFPCAPQDKK                 | 2 |
|            | 100% |  | NGQPCLNNGYCYNGK            | 8 |
|            | 100% |  | RSTGIVQDHSK                | 1 |
|            | 100% |  | SECDAESCTGQSADCPTDNFQR     | 1 |
|            | 100% |  | STGIVQDHSK                 | 4 |
| atx_mpf-1a | 98%  |  | ASQLNFTPEQR                | 1 |
| atx_mpo-1  | 100% |  | GASLCIMRPGLTPGR            | 1 |
|            | 100% |  | NLNSFGEWR                  | 1 |
|            | 100% |  | SLNIDVSLTDLEIWSQDFITVQSSAK | 5 |
|            | 100% |  | VHELVNTINGFYR              | 2 |
|            | 100% |  | YNSDLNIIRK                 | 1 |

**S. Data. 3(C):** Assignment of the FETUA-3 Affinity purified fraction (gel excised, lower band) of *C. atrox* Venom to SVMP genes via Mass Spectrometry by LC-MS/MS

| Protein name | Protein identification probability | SL # | Peptide sequence          | Number of Spectra |
|--------------|------------------------------------|------|---------------------------|-------------------|
| atx_mad-3a   | 100.00%                            |      | RSTGVVQDHSEINLR           | 2                 |
|              | 100.00%                            |      | STGVVQDHSEINLR            | 2                 |
| atx_mad-3b   | 100.00%                            |      | DGICDPKR                  | 7                 |
|              | 100.00%                            |      | ISHDNAQLLTSTDFNR          | 4                 |
|              | 100.00%                            |      | QAIGLAYRDGICDPK           | 1                 |
|              | 100.00%                            |      | RSTGVVQDHSK               | 1                 |
|              | 100.00%                            |      | STGVVQDHSK                | 2                 |
|              | 100.00%                            |      | YFSDCSYIQCWDFIMNQNPPQCILK | 1                 |

|            |         |  |                               |    |
|------------|---------|--|-------------------------------|----|
|            | 100.00% |  | YVELFIVVDHGMYSK               | 2  |
| atx_mad-5a | 100.00% |  | AYTGSMCDPR                    | 1  |
|            | 100.00% |  | AYTGSMCDPRK                   | 2  |
|            | 100.00% |  | ISHDNAQLLTAINFQENIIGR         | 3  |
|            | 100.00% |  | YIELVIVADHR                   | 2  |
|            | 100.00% |  | YNSNLNTIR                     | 1  |
| atx_mdc-4  | 100.00% |  | ASMSECDPAEHCTGQSSECPADVFK     | 3  |
|            | 100.00% |  | DNSPGQNNPCK                   | 5  |
|            | 100.00% |  | ENGNKIPCATEDVK                | 1  |
|            | 100.00% |  | FVELFLVVDK                    | 1  |
|            | 100.00% |  | GNYYGYCR                      | 1  |
|            | 100.00% |  | HDNAQLLTALDLDR                | 1  |
|            | 100.00% |  | ITVKPEAGYTLNAFGWR             | 1  |
|            | 100.00% |  | KENGNKIPCATEDVK               | 3  |
|            | 100.00% |  | KHDNAQLLTALDLDR               | 1  |
|            | 100.00% |  | KKHDNAQLLTALDLDR              | 1  |
|            | 100.00% |  | LYCKDNSPGQNNPCK               | 2  |
|            | 100.00% |  | MYEIVNTVNEIYR                 | 1  |
|            | 100.00% |  | VCSNGHCVDVATAY                | 3  |
|            | 100.00% |  | VIGLAYVGSMPK                  | 2  |
|            | 100.00% |  | YMYIHVALVGLIWSNEDK            | 1  |
| atx_mdc-6a | 98.20%  |  | YVELVIVADHR                   | 1  |
| atx_mpo-1  | 100.00% |  | AYTSSMCNPR                    | 9  |
|            | 100.00% |  | AYTSSMCNPRK                   | 1  |
|            | 100.00% |  | DHSPINLLVGVTMAHELGHNLGMNHDGDK | 17 |
|            | 100.00% |  | GASLCIMRPGLTPGR               | 30 |
|            | 100.00% |  | KRVHELVENTINGFYR              | 3  |
|            | 100.00% |  | KSHDHAQLLTAINFEGK             | 7  |

|         |                                      |    |
|---------|--------------------------------------|----|
| 100.00% | KSVGIVKDHSPINLLVGVTMAHELGHNLGMNHDGDK | 0  |
| 100.00% | NTLNSFGEWR                           | 12 |
| 100.00% | RKSHDHAQLLTAINFEGK                   | 3  |
| 100.00% | RVHELVNTINGFYR                       | 4  |
| 100.00% | SHDHAQLLTAINFEGK                     | 12 |
| 100.00% | SLNIDVSLTDLEIWSDQDFITVQSSAK          | 1  |
| 100.00% | SVGIVKDHSPINLLVGVTMAHELGHNLGMNHDGDK  | 3  |
| 100.00% | SYEFSDDSMGYYSFLNQYKQCILNKPLR         | 1  |
| 100.00% | VFMKYNSDLNIIR                        | 6  |
| 100.00% | VHELVNTINGFYR                        | 13 |
| 100.00% | YNSDLNIIR                            | 13 |
| 100.00% | YNSDLNIIRK                           | 1  |

**S. Data. 4:** (A) FASTA sequence of FETUA sequences used to construct phylogeny in snakes.

| Protein     | Species                       | Source      | Accession                                                                       | Sequence                                                                                                                                                                                                                                                                                                                                                                                  |
|-------------|-------------------------------|-------------|---------------------------------------------------------------------------------|-------------------------------------------------------------------------------------------------------------------------------------------------------------------------------------------------------------------------------------------------------------------------------------------------------------------------------------------------------------------------------------------|
| A.car_FETUA | <i>Anolis carolinensis</i>    | cDNA        | XP_003225747.1                                                                  | MKSLIALVLLGQILASKATSEFPPLVSSLPDCDDPESEAAANFAV<br>DHINSHSLHGYKYTLRSRIENVKVLPRRPTGKIYLLLEDLAETKCHV<br>LSPTPIQNCSVRAKVEHAVEGDCDVKMLHLDGQYKVLSTKCHSS<br>PDSREDFEKVCPDCAPLALLDDVNVVNAVNTALAQYNTYNSTDH<br>HFELLEIARGRNHMPGGTFVEFAIAATNCTEQEAKEHKDCHVM<br>TGEHAQFGFCKATIFKKPSGEGPALFAIFPNVICDIFDKQVGHSH<br>THLTKHHLGKKIPSPGAGYSVLDLIHSHNNTLASHESHSAEVPVV<br>QASPVVKRAAEVPPVIQPALPHLQQCPGKYRHFDI* |
| B.con_FETUA | <i>Boa constrictor</i>        | cDNA        | <a href="http://dx.doi.org/10.5524/100060">http://dx.doi.org/10.5524/100060</a> | MNSLIALVLLGQILGCTLSHHLGLSLDCNSKEAEQYAEQAVHHIN<br>AHNLHGYKQILNIIEDLNIVHRRPRGEVIFIEVNLLKCHVLDPTPI<br>ENCTVRTQQEHAVE TDCDVKLLSDEGITKVVAAKCHSSADSVED<br>PMKNCAHCSVLMPLNDPHVIEVVEYVLHKKHNEQNPNGNVYSVLEI<br>SRGQHRHEPESFYVEFAIVETNCSGQDAAEGHNGCHAKAAADA<br>HVGFCRATVFRKHTATEKLTDEKFESDCVIFEPKAGESHTHLIEH<br>HFGKNIPSPGHNHTLDLIHSHNDTNASHESHSSSEALPEVAAPVV<br>KREVPETVIPPINQPTLPVKLCPGKVVHFKV*   |
| P.biv_FETUA | <i>Python bivittatus</i>      | cDNA        | XP_007434930.1                                                                  | MNSLIALVLLGQILGCTLSHLLPQSDCNSEEAHYAEEGVHYIN<br>THNLHGYKQTLNIIKDLHVLPRRPHGKVI FTELNLLETRCHVLDPT<br>PVENCTVRTQEEHAVEADCDVKLLSDEGVTKVVAVKCHSSPDS<br>VEDVKKLGPNYPIILLPLNDPRVVEVVEYVLHKKHNEQQPDPHFVFEV<br>LEITRGQHKHEPESYYYVEFVFEVETNCSEQESHDAHHDCHPKAAA<br>DAHVGFCRATVFRADATGKLTDEKFESDCVLFQKVGETHVHL<br>IEHHLGKNIPSPGHGHTVLDLAHSHNDTNASHESHSAEVLPEVAA<br>PVVNRDVSPTLPPDDHLTPPVKLCPCGKVVHFKV* |
| P.obs_FETUA | <i>Pantherophis obsoletus</i> | genomic DNA | WJSR01000052.1                                                                  | MNSLVALVLLGQIIGCTFSHLLPQLDCNSEEAEERLAKLAVDYINE<br>HTLHGYRQALNIIKDAHVVPRRPSGKIIFLELSLLETVCHVLDPSPL<br>EKCTVRPQKYHAVEGDCDVKILSDEGIEKVVAVKCHSEPD SAED<br>VLFNCPICPILLPRNDPHVVEVVEYVLHKKHNEQLTGHSYEVLEISR<br>GQHKLEPEAYYVEFAIVETNCSAKEAHDNHHDCHPKAAGEGHL<br>GFCRATVFRSQAATEKPKDEKYESDCIIFDVKVGIPHAHLIEHHYA<br>KNIVSPGHNNTVLDLVHSHNHTSASHETHSHEHAATVAAPVVKR<br>EAPTEGPHDHTHATNLCPGKVVHFKI*     |



|               |                           |             |                 |                                                                                                                                                                                                                                                                                                                                                                                           |
|---------------|---------------------------|-------------|-----------------|-------------------------------------------------------------------------------------------------------------------------------------------------------------------------------------------------------------------------------------------------------------------------------------------------------------------------------------------------------------------------------------------|
| T.ele_FETUA-1 | <i>Thamnophis elegans</i> | genomic DNA | GCA_009769535.1 | MNSLVALVLLGQIIGCTLSHHLVPQFDCNGEEAEKLGNLAVSYIN<br>EHS LHGYKHVVNQIKDAHVLP RRRPHGKVIFLELDLLETVCHVLDP<br>TPIENCSVRAQQYHAVEADCNVKLV SDEGVDKVVAAKCHSEPD<br>SVEDVRQHCPKCPILLSLSDPHVINSANYVLHKHNDKLP HHAYEV<br>LEISRGQQKFDPEGYYVEFAIVETNCTHQEAHDDNYHCDPKALG<br>EAHFGLCRATVFRSHAATGKPTDEQYESDCVIFDVKDGHSHSHL<br>VEHHRKNI VSPGYNNTVLSLIHSHNHTSASHETHSHEHGTAIPP<br>HVAKREVPTVPSHDHTHPIKLC PGKVHHFKV* |
| T.ele_FETUA-2 | <i>Thamnophis elegans</i> | genomic DNA | GCA_009769535.1 | MNSLVALVLLGQIIGCTLSQHLEGWQFDCHDEEVEKLARVAVSYI<br>NEHSHKGYKQVVNQIKDAYALPQRPHGKINHLELNLLETVCHVL<br>DPTPAENCSVRAQNHAVEADCHVKLV SDEGVDKVVAAKCHSQ<br>PDSVEDVRQHCPKCQILLSLSDPNVIDSANYVLHKHNDKLT HHAY<br>EILEISRGQQKFDPEGYYVEFPIVETNCTHQEAHDDTHHCHPKAL<br>GEAHFGFCRATVFRSHAATGDLTDEQYESDCVIFNVKDGHSHSH<br>LVEHHRKSIVSPGYNNTVLDLVHSHNHTSASHETNSDEYGT AIP<br>PHAGKREVPTVPSHGHALIKLFCPGEIHHFKV*     |
| T.ele_FETUA-3 | <i>Thamnophis elegans</i> | genomic DNA | GCA_009769535.1 | MNSLVALVLLGQIIGCTLSHHFGPQFDCNGEEAERFASVAVSYIN<br>EHSIHGYKHALNIIKDVHVL PRRPHGKVIFLELDLLETVCHVLDPT<br>PIENCSVRAQQYHAVEADC DVKLLSDEGVDKVVAAKCHSEPD SV<br>EDVRQHCPKCPILLSLSDPHVVDSANYVLHKHNDKLP HHAYEVL<br>EISRGQQKFDPEGYYVEFAIVETNCTHQEAHDDNYHCDPKALGE<br>AHFGLCRATVFRSHAATGKPTDEKYESDCVIFDVKDGHSHSHLV<br>EHHFRKSIVSPGYNNTVLDLVHSHNHTSASHETHSHEHGTAIPPH<br>VAKREVPTVPSHDHTHPIKLC PGKVHHFKV*  |
| N.naj_FETUA-5 | <i>Naja naja</i>          | genomic DNA | GCA_009733165.1 | MNSLVTLVLLGQIIGCTFSHHLLPQLDCNGEEAENLAELAEQYINE<br>HNLHGYKHTLVNIKDVHVL PRRPHGKVIFLNLEFLETVCHVSDPT<br>PIENCTVRPDYYHAVEAECDVRLLSDEDVVKVASKCHSEADSV<br>ENVRQKCPKCPILIP LNDPHVVQSVEYVLRKYNEEHPEHVFEVLE<br>ISRGQHKYDPEAFYVEFAIVETNCSAQEAHDDHHDCHPKAAGEA<br>RAGFCRATVFRSHADLEKPKDELYESDCVIFDVKVGHSHTHLIEH<br>HFGKNIPSPGHNNTILD LVHSHNHTSASHESNSHEHVAATEVVAP<br>VAKREAPTAVSHDHTHATKLC PGRVHHFKV*  |

|               |                  |             |                 |                                                                                                                                                                                                                                                                                                                                                                                      |
|---------------|------------------|-------------|-----------------|--------------------------------------------------------------------------------------------------------------------------------------------------------------------------------------------------------------------------------------------------------------------------------------------------------------------------------------------------------------------------------------|
| N.naj_FETUA-4 | <i>Naja naja</i> | genomic DNA | GCA_009733165.1 | MNSLVTLVLLGQIIGCTFSVSLLRKFDNCNGEEAEELAKVAVKFINE<br>HNLHGKQTLNIIKEIDVRAPRPKNVEKVVEIYLNLLLETKCHVMD<br>PTPVEKCTVRQQHEHAVEADCLVRIHRELGNKVTGAVCYSKPGS<br>VLKVRQNCTKCPILIPLNDPHVVQSVEYVLRKHNEQLPNHAYEVL<br>EISRGQHQQYDPEAFYVEFAIVETNCSAQEAHDDHHDCPKAAGE<br>AHTGFCRATVFRSHAALPKDEKYESDCVIFDVKEGHSLSHLIE<br>HHYGKNIASPGHNNTILDVHSHNDTDSNESDSLEAVLDPELLV<br>KTEAPAEIAHDPTKAPPVCPGRVHHFEV*     |
| N.naj_FETUA-3 | <i>Naja naja</i> | genomic DNA | GCA_009733165.1 | MNFLVTLVLLGQIIGCTFGTTLSQEFDCNGEEAEKLAKLAVKYIND<br>HNLHGKQTLNVIKEVDFFPAPRPREIVEMVAEMTLNVLETKCHVL<br>DPTPVENCTVRQQHEHAVEAECVVRIHRELGDKVSCHANCSKP<br>GSVGNVRRNCTKCPILIPLNDPHVVQSVEYVLRKHNEQLPNHVY<br>KVLEISRGQHQQYDPEAFYVEFAIVETNCSAQEAHDDHHVCHPKA<br>AGEGHTGFCRATVFRSHAALPKDEKYESDCVIFDVKKGHSLS<br>HLIDHHYGKNIASPGQNNTVLDLVHSHNHKSSSHESLSVEVMAV<br>PLPVVKREAPAEIAHAHAKAAPLCPGKVVHFFKL* |
| N.naj_FETUA-2 | <i>Naja naja</i> | genomic DNA | GCA_009733165.1 | MNFLVTLVLLGQIIGCTFGTTLSQEFDCNGEEAEKLAKLAVKYIND<br>HNLHGKQTLNVIKEVDFFPAPRPREIVEMVAEMTLNVLETKCHV<br>MDPTPVENCTVRQQHEHAVEAECVVRIHRELGDKVSCHANCSK<br>PGSVGNVRRNCKCPILILLNDPHVLQSVEYVLRKHNEQLPNHV<br>YKVLEISRGQHQQYDPEAFYVEFAIVETNCSAQEAHDGHHVCHPK<br>AAGEGRAGFCRTTVFRSHAALPKDEQYELDCVIFDDKKGHSLS<br>SHLIDHHYGKNIASPGHNNTVLDLVHSHNHKSSSHESLSLEAMTV<br>PLPVVKREAPAEIAHAHANAAPLCPGKVVHFFKL* |
| N.naj_FETUA-1 | <i>Naja naja</i> | genomic DNA | GCA_009733165.1 | MNFLVTLVLLGQIIGCTFGTTLSQEFDCNGEEAEKLAKLAVKYIND<br>HNLHGKQTLNVIKEVDFFPAPRPREIVEMVAEMTLNVLETKCHVL<br>DPTPVENCTVRQQHEHAVEAECVVRIHRELGDKVSCHANCSKP<br>GSVGNVRRNCTKCPILIPLNDPHVVQSVEYVLRKHNEQLPNHVY<br>KVLEISRGQHQQYDPEAFYVEFAIVETNCSAQEAHDDHHVCHPKA<br>AGEAHTGFCRATVFRSHAALPKDEKYESDCVIFDVKKGHSLS<br>HLIDHHYGKNIASPGQNNTVLDLVHSHNHKSSSHESLSVEVMAV<br>PLPVVKREAPAEIAHAHAKAAPLCPGKVVHFFKL* |

|               |                         |             |                 |                                                                                                                                                                                                                                                                                                                                                                                          |
|---------------|-------------------------|-------------|-----------------|------------------------------------------------------------------------------------------------------------------------------------------------------------------------------------------------------------------------------------------------------------------------------------------------------------------------------------------------------------------------------------------|
| H.cur_FETUA-1 | <i>Hydrophis curtus</i> | genomic DNA | GCA_019472885.1 | MNSLVTLVLLCQIIGCMFSSHLSPLQDCNGEEAEKLAELAVHYIN<br>KHNHLYGKQALNVIKDVHVLPRRPSGKVIFLELDLLETECHVLDP<br>TPVENCTVRPQHYHAVKGDGCDVKLLSDEGINKVVASKCHSDPDS<br>VEDVRQNCNCPILIPLNDRPHVVQSVVEYVLHKKHNEKQPSHAYEVL<br>EISRGQHKYEPEAFYVEFAIVETNCSAQEAHDDHHDCHPKAAGE<br>AHIGFCRATVFRSHATLEKPKDEQYESDCVIFDVKEGHSHTLIE<br>HHFGRNIASPGENNTVLDLIHSHNHTSASHESHSHEHMVIPVVAA<br>PVAKREAPTEISHDHTHPPKLCPCGKVVHFKV* |
| H.cur_FETUA-2 | <i>Hydrophis curtus</i> | genomic DNA | GCA_019472885.1 | MNSLVTLVLLAQIIECMFSVLLKESDYNGEEAKKYGLAVHYIN<br>QHNLHGKQTLNVIKRVDFLPPPYVEKVVSVELDVLETECHVLDP<br>TPVENCTVRQQDHHAVKSECVVRIHRENGDKVFGANCHSKPDS<br>VENVRQNCCKSPILVPLNDPHVVQSVVEYVLHKKHNEKQPSHA*EV<br>LEISRGQHQYEPEAFYVEFAIVETNCSVQEAHDDHHDCHPKAAG<br>EAHIGFCRATVFRSHAALPKPKDEQYESDCVILDVKEGHSHTLI<br>EHHYGKNIPSPGHNSVVLDAHSHNHTSSSHESHSQERVVEVIV<br>LPLPVAKREAPTETAHDHAKAAPLCPGKVVHFKL*       |
| H.cur_FETUA-3 | <i>Hydrophis curtus</i> | genomic DNA | GCA_019472885.1 | MNSLVTLVLLCQIIGCTLSLLLRFKEDCNGEEAKKFGDLAVHYINQ<br>HNLHGKQTLNVIKRVDFLATRS*PYVEKVVSVELDVLETECHVL<br>DPTLSRIVPVRQQDHHAVKSECVVRIHRENGDKVFGANCHSKPD<br>SVENVRQNCCKSLILVPLNDPHVVQSVVEYVLHKKHNEKQPSHA*E<br>VLEISRGQHQDEPEAFYVEFAIVETNCSAQEAHDDHHDCHPKAA<br>GEAHIGFCRATVFRSHAALPKPKDEQYESDCVIFDVKEGHSHTH<br>LIEHHYGKNIPSPGHNSVVLDAHSHNHTSSSHESHSQERVVEVI<br>VLPLPVAKREAPTETAHDHAKAAPLCPGKVVHFKL* |
| V.ber_FETUA-1 | <i>Vipera berus</i>     | genomic DNA | KN624939        | MNSLIALLLLGQIIGCTFSSHLP SHGDCNGEDAKKWAHLAVHYIN<br>EHTLHGKQDLNIIKDIHVLPRRPRGKIIFLELELLETVCVLDPTP<br>LENCTVRPQHYHAVEGDCDVKIIHDEDVDKVVAAKCHSSPDSVE<br>DVRNCPKCPILFPLNDPHVVDAIEYVLNKHNEKLSGHVVEVLEI<br>SRGQYTFEPEGFYVEFAIVESNCTAQEAQDDHHHCHPNRAGEE<br>HIGFCRATVVRSHASLEKPKDEQFESDCVIFDVKEGHSYSHLIEH<br>HIGKYSTSPGHNTVLNLAHSHNHTSASHESHSHEHVVEVPVAV<br>AKREIPTNIPPHHTHPVNLCPGKVVHFKV*         |

|               |                                   |             |                                                                                 |                                                                                                                                                                                                                                                                                                                                                                                    |
|---------------|-----------------------------------|-------------|---------------------------------------------------------------------------------|------------------------------------------------------------------------------------------------------------------------------------------------------------------------------------------------------------------------------------------------------------------------------------------------------------------------------------------------------------------------------------|
| V.ber_FETUA-2 | <i>Vipera berus</i>               | genomic DNA | KN624939                                                                        | MNSLVALLLLSQIIGSTLSSQVRGDIDCNDKDAKWAGKAVRYIN<br>EHKLGHYKQDLNVIKNIHILPWDGDLVAIYKLNLFLETECHVLDPT<br>PVENCTVRPQHNHAVKIDCDVKIYDIETHKDDVFKCNSTPDSV<br>ENVQQNCPKCPILLPQNDRPHVDDAVEYVLNKHNEKLSGHVVEVL<br>EISRGQHTFEPEGFYVEFAIVESNCTAQEAQDDHHHCHPNTAGE<br>DHIGFCRATVFRSHASLEKPKDEQFESDCVIFDVKKGHAHCYLI<br>QHVKGKSTSPGDNTNVLNLAHSHNHTRASHESHSDCEVVGCPV<br>AFVKKEVPTDISDHDTPSVKGCPCGRVLHFNL* |
| V.ber_FETUA-3 | <i>Vipera berus</i>               | genomic DNA | KN624939                                                                        | MNSLVALLLLGQVIGSTLSSQVRGDIDCNDKDAKWADIWAVRYIN<br>EHKLGHYKQDLNVIKNIHILTWDRDLVAGYKLNLLLETECHVLDPT<br>PVEKCTVRPQHNHTVEMDCDVKIYNVMTLKDEVSVKCNSTTDS<br>VENVQRNCPKCPILLPRNDPHVDDAVEYVLNKHNEKLSGHVVEV<br>LEISRGQHTFEPEGFYVEFAIVQSNCTAQEAQDDHHHCHPNTAG<br>EDHIGFCRATVFRSHASLEKPKDEQFESDCVMFDVKEGHTHSYL<br>IEQHVKGKSTSPGDNTTVLNLAHSHNHTRASHEFHSDCEVVECP<br>VAFVKKEVPTDISDHTPPAKGCPGRVLHFKL* |
| D.acu_FETUA-1 | <i>Deinagkistrod<br/>on actus</i> | genomic DNA | <a href="http://dx.doi.org/10.5524/100196">http://dx.doi.org/10.5524/100196</a> | MNSLVALLLLGQIIGCTFSHHLTSQVDCNGEDA EKWGDMAVHYI<br>NEHNLHGKQALNVIKEIHVLP RRPHGEIVFIEVLETQCHVLDE<br>TPVENCTVRPQHYHAVGGDCDVKIHHHEGVKVVGAKCHSDPD<br>SVEDVRRNCPNCPILLPLSDPRVVDCVEYVLSKHNEKLSGHYEV<br>LEISRGQHQEPEAFYVEFVIVEVNCTAQEAHDDHHHCHPNTAG<br>EDHIAFCRATVFRSLASLEKPKDEKFEFSDCVILNVKEGHAHSHLIQ<br>HHVGKYSISP GHNNTVLNLAHSHNHTSASHESHSHAEVPA<br>VAKREVPTDIPHHMHSHPVKLC PGKVHHFKL*    |
| D.acu_FETUA-2 | <i>Deinagkistrod<br/>on actus</i> | genomic DNA | <a href="http://dx.doi.org/10.5524/100196">http://dx.doi.org/10.5524/100196</a> | MNSLVALLLLGQIIGSTLSSQVRGDLECDNKAKEWADVAVRYIN<br>EHKLGHYKHALNVIKNIVVVPWDGDLVAVFLKLNLLDTECHVSDS<br>TPVENCTVREQHNHAVEMDCDVKIMFDIETFKRDFVFKCHSTPD<br>SVENVRDCPKCLILLPPNDPRVVDSVEYVLSKHNEQLSGHIYEV<br>LEILRGQYKYEPEAFYVEFVIVEVNCTAQEAHDDHHHCHPNTAG<br>EDHIAFCRATVFRSHVGLKPKDKKFEFSDCVILNVKDGHAHSHLI<br>QQHIEKNSISPEHNITILNFIHPQNHTSTSHESHEAAEVPVDFVK<br>KELPTDISNRHTPPVKGCPCPKVHHFEL*   |
| D.acu_FETUA-4 | <i>Deinagkistrod<br/>on actus</i> | genomic DNA | <a href="http://dx.doi.org/10.5524/100196">http://dx.doi.org/10.5524/100196</a> | MNSLVALLLLGQIIGSTLSYLVKEEDLNCNSKAAKYRADQVVRYIN<br>DHKLGHYKQALNVIKIFHLLSPERFSTVFLKLNLLDTECHVLDQT<br>PVEKCTVRPQHNHAVEMDCDAKIIFNYDIYKDYIFVKCNSTP*YEP<br>EAFYVEFVIVEVNCTAQEAHDDHHHCHPNTAGEDHIAFCRATVF<br>RSHASLEKPKDEKFEFSDCVILNVKRGHAYSQLIQHHEKNSISPG                                                                                                                                 |

|                       |                                       |                |                                                                                 |                                                                                                                                                                                                                                                                                                                                                                                      |
|-----------------------|---------------------------------------|----------------|---------------------------------------------------------------------------------|--------------------------------------------------------------------------------------------------------------------------------------------------------------------------------------------------------------------------------------------------------------------------------------------------------------------------------------------------------------------------------------|
|                       |                                       |                |                                                                                 | HNSTVLNLAHSHNHTRASHESHSDCEVVECPVAFVKKNIQTNIPH<br>HTHPVEGCPGRVHFHQL*                                                                                                                                                                                                                                                                                                                  |
| D.acu_FETUA-5         | <i>Deinagkistrod<br/>on actus</i>     | genomic<br>DNA | <a href="http://dx.doi.org/10.5524/100196">http://dx.doi.org/10.5524/100196</a> | MNSLVVLVLLGQVIGSTHSSMVKEEDLNCNSKAAKYRADQAVDY<br>INEHNLHGKQALNVIKIIRLLPSDGLSVIFNLKLNLETKCHVLDP<br>TPVENCTVRPQLNHAVETDCDVKIIYNIATFKDEFVLKCHSTPGSV<br>ENILRDCPKCPILLPLSDPHVVDSVEYVLSKHNEKLSGHIYEVLEI<br>SRGQHQ*HIAFCRATVFRSHASLEKPKDEKFESDCVILHVKGGHA<br>HSHLIQHHTGKYSTSPGHNSTILNVAHSHNYTSASHESHSEHV<br>AEVPVDSVKKEVPTDIPHHHTPPVDGCPGKVLHFHFL*                                          |
| P fla_FETUA-1         | <i>Protobothrops<br/>flavoviridis</i> | genomic<br>DNA | BFFQ01000665                                                                    | MNSLVALLLLGGIIGCTFSHHLPSHVPVDCNGEDAEEKWADLAVD<br>YINEHNLHGKQAVNVINEIFVLPVRRPHGKMILLELNLETECHVL<br>DQTPIKNCTVRPPHYHAVEGDCDVKIIHDEDDVVKVAAKCSNP<br>DSVEDVQQNCPKCPILLSLTDPHVVDSVEYVLEKHNKLSGHIYE<br>VLEISRGQHKYEPEAYYLEFVIVEVNCTAQEAHDDHHQCHPYTA<br>GEEHIGFCRATVFRSHASLEKPKDEKFESDCVIFDIKEGHAHSHLI<br>EHHVGKYSTSPGYNNTVLNLVHSHNHTSASHESHSEHVAEVP<br>VAVAKREVPTDIPHDHTHPVKLCPGKVVHFFHFL* |
| P fla_FETUA-<br>2/H5F | <i>Protobothrops<br/>flavoviridis</i> | genomic<br>DNA | BFFQ01000665                                                                    | MNSLVALVLLGQIIGSTLSSQVRGDLECDDEAKNWADDAVRYIN<br>EHKLHGKQALNVIKNICVVPWNGDLVAVFLELNLETECHVLDP<br>TPVEKCTVRQQHNHAVEMDCDAKIMFNVETFKRDVFKCHSTP<br>DSVENVRRNCSKCPILLPPNPHVVDSVEYVLNKHNEKLSGHIYE<br>VLEISRGQHKYEPEAYYLEFVIVEINCTAQEAHDDHHQCHPYTAG<br>EDHIAFCRSTVFRSHASLEKPKDEKFESDCVILDVVDKGDGHAHSHLI<br>QQHIEKNSISPEHNITILNFVHPDNHTSTSHESHSEHVAEVPVVFVK<br>KELPTDISDHHTTPVKGCPGKVVHFFHFL*  |
| P fla_FETUA-<br>3/HLP | <i>Protobothrops<br/>flavoviridis</i> | genomic<br>DNA | BFFQ01000665                                                                    | MNSLVALVLLGQIIGSTVSFQLGPNMDCNTKGTGDWADIGVHYIN<br>EHKLHGKQALNVIKIFRLLPSDGRSVIFHFNLNLETECHVLDST<br>PVENCTVRPQHNHAVEMDCNVRIIHDITTFEDEVFKCSSTPGSV<br>ENILRDCPKCPILLSPNDPHVVDSVEYVLNKHNEKLSGHIYEVLEI<br>SRGQHKYEPEAYYLEFVIVEINCTAQEAHDDYHQCHPYTAGEDI<br>AFCRSTVFRSHASLEKPKDEKFESDCVILDVKEGHSHSHLIEHHV<br>GKYSTSPGYNSTDECVVECPVAFVNKEVPTDISDHNTPPVKGCP<br>GRVLHFHFL*                       |

|               |                                   |             |              |                                                                                                                                                                                                                                                                                                                                                                                       |
|---------------|-----------------------------------|-------------|--------------|---------------------------------------------------------------------------------------------------------------------------------------------------------------------------------------------------------------------------------------------------------------------------------------------------------------------------------------------------------------------------------------|
| P fla_FETUA-5 | <i>Protobothrops flavoviridis</i> | genomic DNA | BFFQ01000665 | MNSLVALLVLLGQIIGSTHSYVMKEEDLNCNSKGAKY*ADQAVRYI<br>NEHNLHGKQALNVIKIFRLLPSAGFSVIIYLLKLNLETECHVLDST<br>PVENCTVRQQHNHAVETDCDVKIINYNIMTFKDEFLVKCHSTPGSV<br>ENILRDCPKCPILLSLSDPHVVDSVEYVLEKHNKLPVGHVYVFEI<br>SRGQHKYEPEALYLEFVIVEVNCTAQEAHDDHHQCHPYTAGED<br>HIAFCRSTVFRSHASLEKPKDEKFESDCVILDVKEGHAHSHLIQQ<br>HIEKNSISPEHNITILNFVHPHNHTSTSHESHEHVADVPVAFVKKE<br>LPTDISDHHTTPVKGCPCGKVVHFFEL* |
| G.blo_MSF     | <i>Gloydus blomhoffi</i>          | cDNA        | Q5KQS4       | MHFLVALVLLGQIIGSTLSSQVRGDLECNDRKAEWADQAVRYIN<br>EHKLHEYKQALNVIKNIVVVPWNGDLVAVFLKLNLETECHVLDP<br>TPVEKCTIRPQQNHAVEMDCDAKIMFDVETFKQDVFKCHSTPD<br>SVEDVRRNCLKCPILLSPSDPHVVDSEYVVLNKHNEQLSGHVYE<br>VLEISRGQHKYEPEAFYVEFAIVEVNCTAQEAHDDHHHCHPNTA<br>GEDHIAFCRSTVFRSHASLEKPKHENFESDCVILDVKEGHAHSHL<br>IEHHIGKYSTSPGQNSTVECVAECPVAFVNKEVPTDISDRHTTPV<br>KGCPCGKILHFQL*                       |
| G.blo_HLP-B   | <i>Gloydus blomhoffi</i>          | cDNA        | BAD88538     | MNSLVALLVLLGQMIGSTLSHHLQSHVDCNGEDAELWADMAVHYI<br>NEHNLHGKQVFNVINEIHVLPVRRRPRGKIIILELKLLETECHVLDPT<br>PVENCTVRPPHYHAVEGDCDVKILHDEGVKIGAKCHSDPDSV<br>EDVRRNCPKCPILLPLSDPHVVDSVEYVVLNKHNEKLSGHVYEV<br>EISRGQHKYEPEAFYVEFAIVEVNCTAQEAHDDHHHCHPNTAGE<br>NHIGFCRATVFRSHASLEKPKDEQFESDCVIFDVKEGHAHSHLIE<br>HHIGNYNTSPGHNNTVLNLAHSHNHTSASHESHSHVAVVAVPVA<br>VAKREVPTNTPHDHTHPVKLCPGKVVHFFKL*  |
| G.blo_HLP-A   | <i>Gloydus blomhoffi</i>          | cDNA        | BAD88537     | MNSLVALLVLLGQIIGSTLSFQLGPNMDCNTKGTGDWADIGVRYIN<br>EHKLDGYKNALNIIKIFRLLPSDGRSVIVHFKLNLETKCHVLDPTP<br>VENCAVRQQHNHAVEMDCNVRIIHDIATFEDEVFKCKSTPDSV<br>ENVRRNCPKCPILLPPNDPHVVVDSEYVVLNKHNEKLSGHVYEV<br>EISRGQHKYEPEAFYVEFAIVEVNCTAQEARDGHHQCHPYTAGED<br>DHIAFCRATVFRSHASLEKPKDENFESDCVILDVKEGHAHSHLIQ<br>QHIEKYSTSPGHNSTDEYVVECPVAFVEKEVPTDMSDHDTPPVK<br>GCPGRVLHFQL*                     |

|                         |                          |             |                   |                                                                                                                                                                                                                                                                                                                                                                                        |
|-------------------------|--------------------------|-------------|-------------------|----------------------------------------------------------------------------------------------------------------------------------------------------------------------------------------------------------------------------------------------------------------------------------------------------------------------------------------------------------------------------------------|
| B.jar_FETUA-1           | <i>Bothrops jararaca</i> | genomic DNA | JAGTXL010000047.1 | MNSLVALVLLGQIIGSTLSHHLQSHVDCNGEDA EKWAHMAVHYI<br>NEHNQHG YKCALNVINEIRLLPRRPHGTIVFLKLVLETECHVLDP<br>TPTENCTVRPQHYHAVGGDCDVKIIHEEGDKVIGAKCYSDPDS<br>VEDVRRNCPKCPILLNLNDPQVVDSVEYVLNKHNEKVS GHVYEV<br>LEISRGQH KNEPEAYYVEFAIVEVNCTAQEAHDDHHQCHPNTAG<br>ENHIGFCRATVFRSHASLEKPKDEQFESDCVIFDVKDGHAHSHLI<br>EHHVGKYSTSPGHNNTVLNLVHSHNHTSASHESHSHEHVTEVP<br>VAVAKREVPKDVPHDHTHPVKLCPGKVVHFFEL* |
| B.jar_FETUA-2/<br>BJ46a | <i>Bothrops jararaca</i> | genomic DNA | JAGTXL010000047.1 | MNSLVALVLLGQIIGSTLSSQVRGDLECKDAKEWTD TGVRVYIN<br>EHKLHG YKYALNVIKNIVVVPWDGDWVAVFLKLNLLETECHVLDP<br>TPVKNCTVRPQH NHAVEMDCDVKIMFNVDTFKEDVFAKCHSTP<br>DSVENVRRNCPKCPILLPSNNPQVVDSVEYVLNKHNEKLS DHVY<br>EVLEISRGQH KYEPEAYYVEFAIVEVNCTAQELHDDHHHCHPNT<br>AGEDHIAFCRATVFRSHASLEKPKDEQFESDCVILHVKEGHAHS<br>HLIQQHVEKDSISPEHNNTALNFVPHNDTSTSHESHEHLAEVPV<br>AFVKKELPKDISDRHTTPVKGCPGKVVHFFEL* |
| B.jar_FETUA-3           | <i>Bothrops jararaca</i> | genomic DNA | JAGTXL010000047.1 | MNSMVALVLLGQIIGSTLSSQVRGDLPCDDEDSKWWADVGVRYI<br>NEHKLHG YKYALSVIKNIVVVPWDGDWVAVFLKLNLLETECHVLD<br>PTPVKNCTVRTQHNH AVEMDCDVKIMFNVDTFKEDVFAKCHSTP<br>DSVENVRRNCPKCPILLPSNNPQVVDSVEYVLNKHNEQLSDHVY<br>EVLEISRGQH KYEPEAYYVEFAIVEVNCTAQEAHDDHHQCHPNT<br>AGEDHIGFCRATVFRSHASLEKPKDEQFESDCVILHVKKGHAHS<br>HLIQQHVEKDSISPEHNNTALNFVPHNDTRASHESHEHLAKVPV<br>AFVKKELPKDISDRHTTPVVGCPGLRAVGQPY*  |
| B.jar_FETUA             | <i>Bothrops jararaca</i> | genomic DNA | JAGTXL010018706.1 | MNSLVALVLLGQIIGSTHSYLVKEEDLNCNSKAAKYRADQAVHYI<br>NEHKLHG YKYALNVIKIFHLLPPEEFSTVFYKLNLLETECHVDFDP<br>TPVENCNVRPQH NHAVEMDCDVKIIFNFQFFKTEVFVKCNSTPD<br>SVENVRRNSPKCSILLPPNDPQVIDSVEYVLNKHNEQLSGHVYK<br>VLEISRGQH KYEPEAYYVEFAIMEINCTAQEAHDDHHQCHPNTA<br>GEDHIGFCRATVFRSHASLEKPKDEQFESDCVILDVKEGHAHSH<br>LIQQHVEKYSTSPGHNNTALNLVHLHNDTSTSHKSHSGKCPVVF<br>PKKKVPTDIPHHTHPVEGCPGKVLHFEL*    |

|               |                        |             |                |                                                                                                                                                                                                                                                                                                                                                                                             |
|---------------|------------------------|-------------|----------------|---------------------------------------------------------------------------------------------------------------------------------------------------------------------------------------------------------------------------------------------------------------------------------------------------------------------------------------------------------------------------------------------|
| C.tig_FETUA-1 | <i>Crotalus tigris</i> | genomic DNA | XP_039207926.1 | MNSLVALVLLGQIIGCTFSHHLQSQVDCNGEDA EKWADMAVHYI<br>NEHNLHG YKYTTNVINEIHVLP RRPHGVIVFLELKVLETQCHVLDP<br>TPVENCTVRPQHYHAVGGDCDVKILHDEGV DKVIGAKCHSDPDS<br>VEDVRQNC SKCPILLSLSDPHVVD SVEYVLNKYNEKLSGHVYEV<br>LEISRGQH KYEPEAFYVEFAIVEVNCTAEEAHDDHHHCHPNTDG<br>ENHIGFCKATVFRSHASLEKPKDEMFESDCVIFDVKEGHAHSHLI<br>EHHVGKYSTSPGHNSTVLNLVHSHNHTSASHESHSHEHVMEVP<br>VAVAKREVPIDVPHDHTHPVKLCPGKVVHFFQL* |
| C.tig_FETUA-2 | <i>Crotalus tigris</i> | genomic DNA | XP_039207927.1 | MNSLVALVLLGXSIGSTLSSQVRGDLECDNKEAKEWADMAVRYI<br>NEHKLHG YKQALNVIKNILVVPWDGDLVAVYLKLNLLETECHMLD<br>PHPVENCTIRPQNNHAVKMDCNAKIMFDVVTFKQDVFVKCHSTP<br>DSVENVRRNCPKCPILLPWND SHVVDSVEYVLNKHNEKLSGHVY<br>EVLEISRGQH KYEPEAFYVEFAIVEVNCTAEEAHDDHHHCHPNT<br>AGEDHIGFCRATVFRSHASLEKPKDEKFESDCVILHVKEGYAYSH<br>LLYKQIEKYNVPPEFRNTVLNLTHSHNHTSTSHESHEHVAEVPVA<br>FVKKELPTDISDHTPPVEGCPGKALHFQL*        |
| C.tig_FETUA-3 | <i>Crotalus tigris</i> | genomic DNA | XP_039207923.1 | MNSLVALVLLGQIIGSTLSFQLAPNMDCNTKGTGDWADIGVRYIN<br>EHKLHG YKQALNIIKIFRLLPSDGLSVMFHFKLNLLETECHVLDPT<br>PVENCIVRQKNNHAVEMDCNVRIIHDIATFGDEVFVKCNSTPDSV<br>ENVRRNCPKCPILLPPNDPHVVD SVEYVLNKHNEQLSGHVYEV<br>EISRGQH KYEPEAFYVEFAIVEVNCTAEEAHDDHHHCHPNTAGE<br>DHIGFCRATVFRSHASLEKPKDEKFESDCVILHVKKGHAYSHLIE<br>HHVGKYNTSPGRNSTDECVVECPVAFVNKEVPKDISDHTPPVE<br>GCPGKALHFQL*                          |
| C.tig_FETUA-4 | <i>Crotalus tigris</i> | genomic DNA | XP_039207924.1 | MNSLVVLVLLGQIIGSTHSYMVREEHLNCNSKAAKYRADQAVRYI<br>NEHKLHG YKQALNIIKTFHLLPPERFTTVFYLKLNLLETECHVLDP<br>TPVENCTVRPQNNHAVEMDCDVKINFNFEFFKTEIFVKCNSTPNS<br>VENVRRNCPCEPILLPPNDPHVIDSVEYVLNKHNEKLSGHVYEV<br>EISRGQH KYEPEAFYVEFAIVEVNCTAEEAHDDHHHCHPNTAGE<br>DHIGFCRATVFRSHASLEKPKDEKFESDCVILHVKEGHATSHLIE<br>HHTGKYSTSPGRNSTDECVVECPVAFVKKEVPHIPHHTHPVEG<br>CPGKVFHFQL*                           |



|               |                          |             |              |                                                                                                                                                                                                                                                                                                                                                                                   |
|---------------|--------------------------|-------------|--------------|-----------------------------------------------------------------------------------------------------------------------------------------------------------------------------------------------------------------------------------------------------------------------------------------------------------------------------------------------------------------------------------|
| C.tig_FETUA-5 | <i>Crotalus tigris</i>   | genomic DNA | LOC120311907 | MNSLVVLVLLGQIIGSTLSYVMREEDLNCNSKAAKYRADQAVHYI<br>NEHNLHGKQALNIIKTIRLLPSDGLSVIYKLNLLTECHVLDPT<br>VENCTVRQQNNHAVETDCDVKIIYNIETFKDEFVLKCHSTPGSVE<br>NILQDCPKCPILMPLSEPHVTDSVEYVLNKHNEQLSGHVVEVLEI<br>SRGQHKYEPEAFYVEFAIVEVNCTAQEAHDDHHHCHPNTDGEN<br>HIGFCRATVFRSYASLEKPKVEMSESDCVILDVKEGHAHSHLIEH<br>HVGKYSISPGHNNTVLNLAHSHNHTSASHESHSHEHVTEVPVAV<br>AKREVPTDIPHHHTPSVDGCPGKVLHFKL*  |
| C.hor_FETUA-5 | <i>Crotalus horridus</i> | genomic DNA | OP223732     | MNSLVALVLLGQIIGSTHSYVMREEDLNCNSKAAKYRADQAVHYI<br>NEHNLHGKQALNIIKTIRLLPSDGLSVIMYKLNLLTECHVLDPT<br>PVENCTVRQQNNHAVETDCDVKIIYNIETFKDEFVLKCHSTPGSV<br>EKILEDPCPKPLLSLSDPHVDSVEYVLNKHNEKLSGHVVEVLEI<br>SRGQHKYEPEAFYVEFAIVEVNCTAQEAHDDHHHCHPNTAGEN<br>HIAFCRATVFRSYASLEKPKDEKFEFSDCVILHVKEGHTHSHLIEHH<br>IGKYSTSPGHNSTVLNLAHSHNHTSASHESHSHEHVTEVPVAVA<br>KREDPTDIPHHHTPSVDGCPGKVLHFKL* |
| C.hor_FETUA-4 | <i>Crotalus horridus</i> | genomic DNA | OP223732     | MNSLVVLVLLCQIIGSTYSYVMREEDLNCNSKAAKYRADQAVRYI<br>NEHKLHGKQALNIIKIFHLLPPERFMTVFYKLNLLTECHVLDP<br>TPVENCTVRPQNNHAVEMDCDVKINFNFEFFKTEIFVKCNSTPDS<br>VENVQRNCEPCPILLPPNDPHVINSVEYVLNKHNEKLSGHVVEVL<br>EISRGQHKYEPEAFYVEFAIVEVNCTAEEAHDHCHPNTAGK<br>DHIGFCRATVFRSHASLEKPKDEMFEFSDCVIFDVKKGHAHSHLIQ<br>QHIGKYNISPGHNAVLNLAHSHNDTRASQESHSDCEVVECPVA<br>FVKKEVPTHIPHHHTHPVEGCPGKVFHFQL*   |
| C.hor_FETUA-3 | <i>Crotalus horridus</i> | genomic DNA | OP223732     | MNSLVALMLLGQIIGSTLSFQLAANMDCNTKGTGDWADIGVRYIN<br>EHKLHGKQDLNIIKIFRLLPSDGRSVIFHFKLNLLTECHVLDPT<br>VENCTVRQQNNHAVEMDCNVRIIHDIATFEDEVFKCNSTPDSV<br>ENVRRNCPKCPILLPPNDPHVDSVEYVLNKHNEKLSGHIYEVLE<br>ISRGQHKYEPEAFYVEFAIVEVNCTAEEAHDHCHPNTDGEN<br>HIGFCRSTVFRSHASLEKPKDEKFEFSDCVILHVKEGHAHSHLIEH<br>HVGKYSTSPGRNSTDECVVECPVAFVNKEVPKDISDHDTPPVEG<br>CPGKVLHFQL*                        |
| C.hor_FETUA-2 | <i>Crotalus horridus</i> | genomic DNA | OP223732     | MNSLVALVLLGQIIGSTLSSQVRGDLECDDEKEAWADIYVRYIN<br>EHKLHGKQALNVIKILVVPWNGDLVAVFLKLNLLTECHVLDP<br>TPVENCTVRPQNNHAVEMDCDAKIMFDVVTFTKDVFKCHSTPD<br>SVENVRRNCPKCPILLPRNDSHVDSVEYVLNKHNEKLSGHVVE<br>VLEISRGQHKSEPEAFYVEFAIVEVNCTAQEAHDDHHHCHPNTT                                                                                                                                          |

|               |                            |             |          |                                                                                                                                                                                                                                                                                                                                                                                       |
|---------------|----------------------------|-------------|----------|---------------------------------------------------------------------------------------------------------------------------------------------------------------------------------------------------------------------------------------------------------------------------------------------------------------------------------------------------------------------------------------|
|               |                            |             |          | GEDHIGFCRATVFRSHASLEKPKDEKFESDCVIFDVKEGHAHSHL<br>IEHHVGKYSTSPGRNSTDECVVECPVAFVNKELPTDISDHHTTPV<br>KGCPGKVLHFQL*                                                                                                                                                                                                                                                                       |
| C.hor_FETUA-1 | <i>Crotalus horridus</i>   | genomic DNA | OP223732 | MNSLVALVLLGQIIGCTFSHHLQSQVDCNGEDAELKQWADMAVHYI<br>NEHNLHGKYKYNVINEIHVLPVRRRPRGEIVFLELKVLETQCHVLD<br>PTPVENCTVRPLHYHAVGGDCDVKIIHDEGVKIVIGAKCHSDPD<br>SVEEVRNCPCEPILLSLSDPHVINCVEYVLNKNKYNEKLSGHVYEV<br>LEISRGQHKYEPEAFYVEFAIVEVNCTAEEAHDDHHHCHPNTDG<br>ENHIGFCRATVFRSHASLEKPKDEMFCSDCVIFDVKEGHAHSHLI<br>EHHVGKYSTSPGHNTVLNLIHSHNHTSASHESHSHEHMTEVPV<br>AVAKREVPTDVPDHHPVLCPCGKVVHFKL*  |
| C.scu_FETUA-5 | <i>Crotalus scutulatus</i> | genomic DNA | OP566391 | MNSLVALVLLGQIIGSTHSYMVREEDLNCNSKAAKYRADQAVHYI<br>NEHNLHGKYKALNIIKTIRLLPSDGLSVIYLKLNLETECHVLDPTP<br>VENCTVRQQNNHAVETDCDVKIIYNIETFKDEFVVKCHSTPGSVE<br>KILQDCPKCPILLSLSDPHVVDVVEYVLNKNHNEQLSGHVYEVLEIS<br>RGQHKYEPEAFYVEFAIVEVNCTAQEAHDDHHHCHPNTAGEDHI<br>AFCRATVFRSYASLEKPKDEMSESDCVILDVKEGHAHSHLIEHHT<br>GKYSTSPGHNSTVLNLAHSHNHTSASHESHSHEHVTEVPVAVAK<br>REVPTDIPHHHTPSVDGCPGKVLHFQL*  |
| C.scu_FETUA-4 | <i>Crotalus scutulatus</i> | genomic DNA | OP566391 | MNSLVALVLLGQIIGSTLSYMVREEDLNCNSKAAKYRADQAVRYI<br>NEHKLHGKYKALNIIKTFHLLPPERFTTVFYLKLNLLETECHVLDP<br>TPVENCTVRPQYNHAVEMDCDVKINFNFEFFKTEIFVKCNSTPDS<br>VENVR*NCPECPILLPPNDPHVIDSVEYVLNKNHNEKLSGHIYEVLE<br>ISRGQHKYEPEAFYVEFAIVEVNCTAEEAHDDHHHCHPNTAGED<br>HIGFCRATVFRSHASLEKPKDEKFESDCVILHVKKGHASHLIQQ<br>HIGKYNISPGHHNTVLNLAHSHNDTRASQESHSDCEVVECPVAF<br>VKKEVPTHIPHHHTHPVEGCPGKVVHFKL* |
| C.scu_FETUA-3 | <i>Crotalus scutulatus</i> | genomic DNA | OP566391 | DGLSVIFHFKNLLETECHVLDPTPLENCTVRQQNNHAVEMDCN<br>VRIIHDIAFDEVEFVKCNSTPDSVENVRRNCPKCPILLPPNDPHV<br>VDSVEYVLNKNHNEKLSGHIYEVLEISRGQHKYEPEAFYVEFAIVE<br>VNCTAEEAHDDHHHCHPNTDGENHIGFCRATVFRSHASLEKPK<br>DEKFESDCVILHVKKGHAYSHLIEHHVGKYNTSPGRNSTDECVV<br>ECPVAFVNKEVPKDISDHDTTPVEGCPGKALHFQL*                                                                                                 |

|               |                            |             |          |                                                                                                                                                                                                                                                                                                                                                                                    |
|---------------|----------------------------|-------------|----------|------------------------------------------------------------------------------------------------------------------------------------------------------------------------------------------------------------------------------------------------------------------------------------------------------------------------------------------------------------------------------------|
| C.scu_FETUA-2 | <i>Crotalus scutulatus</i> | genomic DNA | OP440564 | MNSLVALVLLGQIIGSTLSSQVRGDLECDKKEAWADMAVRYI<br>NEHKLHGYKQALNVIKNILVVPWDGDLVAVYLKLNLETECHVLD<br>PTPVENCTIRPQNNHAVKMDCAKIMFDVVTFKQDVFVKCHSTP<br>DSVENVRRNCPECPILLPRNDSHVVDSVEYVLNKHNEKLSGHVY<br>EVLEISRGQHKYEPEAFYVEFAIVEVNCTAQEAHDDHHHCHPNT<br>AGENHIGFCRATVFRSHASLEKPKDEKFESDCVILHVKEGHAHS<br>HLIEHHVGKYNTSPGRNSTDECVVSSLTKATGRPVAFVNKEV<br>PADISDHHTTPVKGCPGKVLHFQL*               |
| C.scu_FETUA-1 | <i>Crotalus scutulatus</i> | genomic DNA | OP440564 | MNSLVALVLLGQIIGCTFSHHLQSQVDCNGEDAELKAWADMAVHYI<br>NEHNLHGYKYTTNVINEIHVLP RRPHGEIIFLELKVLETQCHVLDP<br>TPVENCTVRPLHYHAVGGDCDVKILHDEGVKIGAKCHSDPDS<br>VEDVRRNCPNCPILLSLSDPHVVDSEYVLNKHNEKLSGHVYEV<br>LEISRGQHKYEPEAFYVEFAIVEVNCTAEEAHDHCHPNTAG<br>ENHIGFCRATVFRSHASLEKPKDEKFESDCVIFDVKEGHAHSHLI<br>EHHTGKYSTSPGHNNTVLNLVHSHNHTSASHESHSEHMTEVP<br>VAVAKREVPTDVPDHHTHPVKLCPGKVHFFKL*    |
| C.atx_FETUA-5 | <i>Crotalus atrox</i>      | cDNA        | OP616715 | MNSLVALVLLGQIIGSTHSYVMREEDLNCNSKAAKYRADQAVRYI<br>NEHNLHGYKQALNIIKTIRLLPSDGLLVVIYLLKLNLETECHVLDPT<br>PVENCTVRQQNNHAVETDCDVKVIYNIETFKDEFVLKCHSTPGS<br>VEKILQDCPKCPILLSLSDPHVVDSEYVLNKHNEQLSGHVYEV<br>EISRGQHKYEPEAFYVEFAIVEVNCTAQEAHDDHHHCHPNTAGE<br>NHIGFCRATVFRSHASLEKPKDEMSESDCVILDVKEGHAHSHLIE<br>HHTGKHSTSPGHNSTVLNLAHSHNHTSASHESHSEHVMEVPV<br>AVANREDPTDIPHHHTPSVDGCPGKALHFQL* |
| C.atx_FETUA-4 | <i>Crotalus atrox</i>      | cDNA        | OP616716 | MNSLVALVLLGQIIGSTLSYVMKEEDMNCNSKAAKYRADQAVRYI<br>NEHKLHGYKQALNIIKTFHLLPPERFTTVFYLLKLNLETECHVLDP<br>TPVENCTVRPQNNHAVEMDCDVKINFNFEFFKTEIFVKCNSTPDS<br>VENVQRNCPKCPILLPPNDPHVINSVEYMLNKHNEKLSGHVYEV<br>LEISRGQHKYEPEAFYVEFAIVEVNCTAEEAHDHCHPNTAG<br>EDHIGFCRSTVFRSHASLEKPKDEMSESDCVILHVKKGHSHSHLI<br>QQHIGKYNISPGHHNTVLNLAHSHNDTRASQESHSDCEVVECPV<br>AFVKKEVPTHIPHHHTHPVEGCPGKVHFFKL* |

|               |                            |             |          |                                                                                                                                                                                                                                                                                                                                                                                        |
|---------------|----------------------------|-------------|----------|----------------------------------------------------------------------------------------------------------------------------------------------------------------------------------------------------------------------------------------------------------------------------------------------------------------------------------------------------------------------------------------|
| C.atx_FETUA-3 | <i>Crotalus atrox</i>      | cDNA        | OP616717 | MNSLVALVLLGQIIGSTLSFQLAGNMDCNTKGTKDWADIGVRYIN<br>EHKHLHGYKQALNIIKIFRLLPSDGRSVIFHFKNLLETECHVLDPTP<br>LENCTVRQQNNHAVEMDCNVRIIHDIATFEDEVFKCNSTPDSVE<br>NVRRCNPKCPILLPPNDPHVIDSVEYVLNKHNEKLSGHIYEVLEIS<br>RGQHKYEPEAFYVEFAIVEVNCTAEEAHDDHHCHPNTDGENHI<br>GFCRATVFRSHASLEKPKDEKFESDCVILHVKKGHAYSHLIEHHV<br>GKYNTSPGRNSTDECVVQCPVAFVNKEVPKDISDHDTPPVEGC<br>PGKALHFQL*                        |
| C.atx_FETUA-2 | <i>Crotalus atrox</i>      | cDNA        | OP616718 | MNSLVALVLLGQIIGSTLSSQVRGDLECDDEAKEWADMVAVRYI<br>NEHKLHGYKQALNVIKNILVVPWDGDLVAVYLKLNLETECHVLD<br>PHPVENCTIRPQNNHAVKMDCNAKIMFDVVT<br>FKQDVFVKCHSTPDSVENIRRCNPKCPILLPRNDSHVVDSVEYVL<br>NKHNEKLSGHIYEVLEISRGQHKYEPEAFYVEFAIVEVNCTAQEA<br>HDDHHHCHPNTAGEDHIGFCRATVFRSHASLEKPKDEKFESDCV<br>ILHVKEGHVHSHLIEHHTGKYSTSPGSNSTDECVVQCPVAFVNK<br>ELPTDISDHHTTPVKGCPGKVFHFQL*                       |
| C.atx_FETUA-1 | <i>Crotalus atrox</i>      | cDNA        | OP616719 | MNSLVALVLLGQIIGCTFSHHLQSQIDCNGEDAEEKWADMVAVHYIN<br>EHNHGHYKYTTNVINEIHVLPWRPHGEIIFLELKVLETQCHVLDPT<br>PVENCTVRPLHYHAVGGDCDVKIIHDEGVKIVIGAKCHSDPDSV<br>ENVRQNCPECPILLSLSDPHVDCVEYVLNKNYNEKLSGHIYEVLEI<br>SRGQHKYEPEAFYVEFAIVEVNCTAEEAHDDHHHCHPNTAGEN<br>HIGFCRATVFRSHASLEKPKDEMFEFSDCVIFDVKEGHAHSHLIEH<br>HTGKYSTSPGHNNTVNLNLIHSHNHTSASHESHSDHEMTEVPVAV<br>AKREVPTDVPDHTHPVKLCPGKVHFFKL* |
| C.ada_FETUA-5 | <i>Crotalus adamanteus</i> | genomic DNA | OP223730 | MNSLVALVLLGQIIGSIHYSYVREEDLNCNSKAAKYRADQAVQYI<br>NEHNHGHYKQALNIIKTIRLLPSDGLLVVIYKLNLETECHVLDPT<br>PVENCTVRPQNNHAVETDCDVKIIYNIETFKDEFKLVKCHSTPGSV<br>EKILQDCPKCPILLPPNDPHVVDVEYVLNKHNEKLSGHVYEVLEIS<br>RGQHKYEPEAFYVEFAIVEVNCTAQEAHDDHHHCHPNIAGEDHI<br>GFCRATVFRSYASLEKPKDEKFESDCVILDVKEGHAHSHLIQQHI<br>GKYSTSPGHNNTVNLNLAHSHNHTSASHESHSEHVTEVPVAVA<br>KREDPTDIPHHHTPSVDGCPGKVLHFKL*    |

|               |                            |             |          |                                                                                                                                                                                                                                                                                                                                                                                      |
|---------------|----------------------------|-------------|----------|--------------------------------------------------------------------------------------------------------------------------------------------------------------------------------------------------------------------------------------------------------------------------------------------------------------------------------------------------------------------------------------|
| C.ada_FETUA-4 | <i>Crotalus adamanteus</i> | genomic DNA | OP223730 | MNSLVVLVLLGQIIGSTHSYVREEDMNCNSKAAKYRADQAVRY<br>INEHKLHGYKQALNIIKTFHLLPPERFTTVFYLKLNLLLETECHVLDP<br>TPVENCTVRPQNNHAVEMDCDVKINFNFEFFKTEIFVKCNSTPDS<br>VENVRRNCPECPILLPPNDPHVIDSVEYVLNKHNEKLSGHIYEVL<br>EISRGQHKYEPEAFYVEFAIVEVNCTAEEAHDDHHHCHPNTDGE<br>NHIGFCRATVFRSHASLEKPKDEKFESDCVILHVKEGHAHSHLIQ<br>QHIGKYNISPGHNNTVLNLAHSHNDTRASQESHSDCEVVECPVV<br>FVKKEVPTHIPHHTHPVEGCPGKVFHFQL* |
| C.ada_FETUA-3 | <i>Crotalus adamanteus</i> | genomic DNA | OP223730 | MNSLVALMLLGGIIGSTLSFQLAGNMDCNTKGTKDWADIGVRYIN<br>EHKLHGYKQALNIIKIFRLLPSGGLSVIFHFKLNLLLETECHVLDPTP<br>VENCTVRPQNNHAVEMDCNVRIIHDIATFEDEVFVKCNSTPDSLE<br>NVRNCPKCPILLPPNDPHVVDVSEYVLNKHNEKLSGHIYEVLEI<br>SRGQHKYEPEAFYVEFAIVEVNCTAEEAHDDHHHCHPNTDGEN<br>HIGFCRATVFRSHASLEKPKDEKFESDCVILHVKEGHAHSHLIQH<br>HTGKYSTSPGRNSTDECVVECPVAFVNKELPTDISDHDTPPVEG<br>CPGKVLHFQL*                    |
| C.ada_FETUA-2 | <i>Crotalus adamanteus</i> | genomic DNA | OP223730 | MNSLVALVFLGQIIGSTLSSQVRGDLECCDKEAKEWADMVRYI<br>NEHKLHGYKEALNVIKNILVVPWNGDLVAVFLKLNLLLETECHVLD<br>PTPVENCTVRPQNNHAVEMDCDAKIMFDVVTFFKKDVFVKCLSTP<br>DSVENVRRNCPKCPILLPRNDSHVVDSVEYVLNKHNEKLSGHVY<br>EVLEISRGQHKYEPEAFYVEFAIVEVNCTAQEAHDDHHHCHPNT<br>AGEDHIGFCRATVFRSHASLEKPKDEKFESDCVILHVKEGHAHS<br>HLIEHHTGKYSTSPGRNSTDECVVQCPVAFVNKELPTDISDHHTT<br>PVKGCPCPKVFHFQL*                  |
| C.ada_FETUA-1 | <i>Crotalus adamanteus</i> | genomic DNA | OP223731 | MNSLVALVLLGQIIGCTFSHHLQSQIDCNGEDAEEKWADMVHYIN<br>EHNHGYKYTTNVINEIHVLP RRPHGEIIFLELKVLETQCHVLDPT<br>PVENCTVRPLHYHAVGGDCDVKIIHDEGVKIGAKCHSDPDSV<br>ENVRQNCPECPILLSLSDPHVIDSVEYVLNKNYNEKLSGHVYEVLEI<br>SRGQHKYEPEAFYVEFAIVEVNCTAEEAHDDHHHCHPNTDGEN<br>HIGFCRATVFRSHATLEKPKDEM FELDCVIFDVKEGHAHSHLIEH<br>HVGKYSTSPGHNNTVLNLIHSHNHTSASHESHSEHMMEVPVA<br>VAKREVPTDVP HDHTHPVKLCPGKVHFKL*   |

## SI References

1. N. L. Dowell, *et al.*, The Deep Origin and Recent Loss of Venom Toxin Genes in Rattlesnakes. *Current Biology* **26**, 2434–2445 (2016).
2. C.-S. Chin, *et al.*, Nonhybrid, finished microbial genome assemblies from long-read SMRT sequencing data. *Nat Methods* **10**, 563–569 (2013).
3. N. L. Dowell, *et al.*, Extremely Divergent Haplotypes in Two Toxin Gene Complexes Encode Alternative Venom Types within Rattlesnake Species. *Current Biology* **28**, 1016–1026.e4 (2018).
4. S. M. Kielbasa, R. Wan, K. Sato, P. Horton, M. C. Frith, Adaptive seeds tame genomic sequence comparison. *Genome Res* **21**, 487–493 (2011).
5. S. F. Altschul, W. Gish, W. Miller, E. W. Myers, D. J. Lipman, Basic local alignment search tool. *J Mol Biol* **215**, 403–410 (1990).
6. H. Li, “Aligning sequence reads, clone sequences and assembly contigs with BWA-MEM” (2013).
7. H. Li, J. Barrett, A statistical framework for SNP calling, mutation discovery, association mapping and population genetical parameter estimation from sequencing data. **27**, 2987–2993 (2011).
8. P. Danecek, *et al.*, Twelve years of SAMtools and BCFtools. *Gigascience* **10**, giab008 (2021).
9. F. Hahne, R. Ivanek, “Visualizing Genomic Data Using Gviz and Bioconductor” in *Statistical Genomics: Methods and Protocols*, S. D. Ewy Mathé, Ed. (2016), pp. 335–351.
10. H. F. Williams, *et al.*, Mechanisms underpinning the permanent muscle damage induced by snake venom metalloprotease. *PLoS Negl Trop Dis* **13** (2019).
11. A. I. Nesvizhskii, A. Keller, E. Kolker, R. Aebersold, A Statistical Model for Identifying Proteins by Tandem Mass Spectrometry. *Anal Chem* **75**, 4646–4658 (2003).
